## 1 **Leveraging a self-cleaving peptide for tailored control in proximity labeling proteomics**

2 Louis Delhaye<sup>1,2,4,5</sup>, George D. Moschonas<sup>1,3</sup>, Daria Fijalkowska<sup>1,2</sup>, Annick Verhee<sup>1,2</sup>, Delphine De  
3 Sutter<sup>1,2</sup>, Tessa Van de Steene<sup>1,2</sup>, Margaux De Meyer<sup>1,3</sup>, Laura Van Moortel<sup>1,2,4</sup>, Karolien De  
4 Bosscher<sup>1,2,4</sup>, Thomas Jacobs<sup>6,7</sup>, Sven Eyckerman<sup>1,2,4,\*</sup>

5 <sup>1</sup> VIB-UGent Center for Medical Biotechnology, VIB, Belgium

6 <sup>2</sup> Department of Biomolecular Medicine, Faculty of Medicine and Health Sciences, Ghent  
7 University, Belgium

8 <sup>3</sup> Department of Biochemistry and Microbiology, Faculty of Sciences, Ghent University, Belgium

9 <sup>4</sup> Cancer Research Institute Ghent (CRIG), Ghent University, Belgium

10 <sup>5</sup> OncoRNALab, Center for Medical Genetics Ghent (CMGG), Ghent University, Belgium

11 <sup>6</sup> VIB-UGent Center for Plant Systems Biology, VIB, Belgium

12 <sup>7</sup> Department of Plant Biotechnology and Bioinformatics, Faculty of Sciences, Ghent University,  
13 Belgium

14 \* Corresponding author: [sven.eyckerman@ugent.vib.be](mailto:sven.eyckerman@ugent.vib.be)

### 15 **Motivation**

16 In proximity labeling proteomics protein-protein interactions are identified by *in vivo* biotinylation.  
17 However, the current lack of a universally applicable negative control for differential analysis  
18 affects accurate mapping of the interactome. To bridge this gap, we conceptualized a system  
19 based on the T2A self-cleaving peptide to match expression levels between control and bait  
20 protein setups while using the same bait protein. In addition, we implemented a versatile modular  
21 cloning system to build mammalian expression vectors for, but not limited to, proximity labeling  
22 assays.

### 23 **Summary**

24 Protein-protein interactions play an important biological role in every aspect of cellular  
25 homeostasis and functioning. Proximity labeling mass spectrometry-based proteomics  
26 overcomes challenges typically associated with other methods, and has quickly become the  
27 current state-of-the-art in the field. Nevertheless, tight control of proximity labeling enzymatic  
28 activity and expression levels is crucial to accurately identify protein interactors. Here, we  
29 leverage a T2A self-cleaving peptide and a non-cleaving mutant to accommodate the protein-of-  
30 interest in the experimental and control TurboID setup. To allow easy and streamlined plasmid  
31 assembly, we built a Golden Gate modular cloning system to generate plasmids for transient  
32 expression and stable integration. To highlight our T2A Split-link design, we applied it to identify

33 protein interactions of the glucocorticoid receptor and SARS-CoV-2 nucleocapsid and NSP7  
34 proteins by TurboID proximity labeling. Our results demonstrate that our T2A split-link provides  
35 an opportune control that builds upon previously established control requirements in the field.

## 36 INTRODUCTION

37 Proximity labeling proteomics has revolutionized protein-protein interaction (PPI) discovery.  
38 Enzymes such as BirA<sup>1</sup>, HRP<sup>2</sup>, APX<sup>3</sup>, Ubc12<sup>4</sup>, and PafA<sup>5</sup> have all been engineered to allow  
39 promiscuous labeling of proteins in live cells. These enzymes can be genetically attached to a  
40 bait protein to covalently label proteins in close proximity. Especially BirA (BioID) and APX  
41 (APEX2<sup>6</sup>) have been widely used. Whereas the original BioID utilizes a R118G mutant version of  
42 the *E. coli* biotin ligase BirA, termed BirA\*, more recent derivatives such as TurboID<sup>7</sup> have been  
43 engineered using directed evolution. TurboID allows for shorter labeling times (10 min to a few  
44 hours) compared to the original BioID (15-18 hours<sup>1</sup>) making it preferable for interaction dynamics  
45 and temporal control. Both BioID and APEX2 catalyze the covalent attachment of biotin handles  
46 to certain amino acid side chains upon supplementation of a biotin substrate. After lysis,  
47 biotinylated proteins are captured by streptavidin enrichment. The *in vivo* labeling permits  
48 stringent lysis and washing conditions that effectively nullify the loss of interactors due to post-  
49 lysis dissociations caused by lowering the concentration of protein partners upon lysis. In addition,  
50 these harsh conditions prevent post-lysis associations due to aspecific protein binding to the  
51 affinity resin and associated reagents, as well as to the formation of non-physiological PPIs  
52 caused by loss of subcellular compartmentalization<sup>8,9</sup>. Therefore, these harsh conditions reduce  
53 the number of false positives compared to antibody-based affinity purification approaches. In  
54 contrast, due to the promiscuous nature of the labeling enzyme, non-interacting bystander  
55 proteins can also be labeled and act as false positives. To limit the extent of false positives  
56 identified this way, a quantitative proteomics approach with a suitable negative control has to be  
57 employed. Such controls should contain a comparable labeling activity, and be (partially) located  
58 in the same subcellular location to match the proteome that can be labeled. Most notably, to match  
59 labeling activity quantitatively, expression levels of the labeling enzyme need to be equivalent  
60 across all conditions. Typical used negative controls include irrelevant bait proteins, such as GFP,  
61 tagged with the labeling enzyme, or a free untagged labeling enzyme. Although expression levels  
62 can be matched by inducible dose-dependent promoters, different properties of these irrelevant  
63 proteins, such as the tendency to aggregate, can severely impact the identified interactome. In  
64 addition, the protein of interest might induce specific changes in the global proteome, e.g.  
65 transcription factors, that may or may not affect the interactome. As the aforementioned negative  
66 controls setups are unlikely to induce these global proteomic changes or to the same extent,  
67 significantly enriched interactors might simply reflect differences in global proteomes between  
68 both setups rather than specific interactomes.

69 To overcome these limitations, we extended on our previous design to use a T2A self-cleaving  
70 peptide for proximity labeling of endogenous bait proteins<sup>10</sup>. Inclusion of the T2A peptide in a  
71 coding sequence causes ribosomal skipping of the G-P peptide bond at the C-terminus of the  
72 peptide, effectively generating a translational polycistron in which the proteins up- and  
73 downstream of the T2A peptide are physically separated, yet translated at equimolar amounts<sup>11,12</sup>.  
74 We reasoned that engineering a control cell line containing an inactivated T2A (MUTT2A)  
75 sequence would provide the opportunity to use the same bait protein for the experimental and  
76 control setup (Fig. 1). This strategy overcomes the challenges described before. To permit  
77 customizable and rapid plasmid assembly of proximity labeling constructs for mammalian  
78 expression, we built a modular cloning system based on Golden Gate assembly to generate  
79 plasmids for lentiviral and transposon-based genomic integration of transgenes in mammalian  
80 cell lines.

## 81 RESULTS

### 82 *Establishing a Golden Gate modular assembly platform for mammalian expression* 83 *constructs*

84 Golden GateWAY and GreenGate utilize a sequential cloning approach of Golden Gate and  
85 Multisite Gateway<sup>TM</sup> cloning to rapidly generate complex expression vectors<sup>13,14</sup>. However, the  
86 system does not allow for mammalian expression. Therefore, as a starting point, we adjusted the  
87 Golden GateWAY (GGW) and GreenGate platforms to be compatible with mammalian  
88 expression. As is common in modular cloning platforms, GGW contains a hierarchy of three  
89 levels. First six modules (Level-0) are cloned in a one-pot BsaI-based Golden Gate assembly mix  
90 into transcriptional units (TU; Level-1). Modules are flanked by BsaI recognition sites that  
91 generate unique overhangs, termed A to G, depending on the component that the module  
92 includes. The unique overhangs for each position allow unidirectional assembly of the modules.  
93 We adopted these overhangs, but slightly changed the content of certain positions. Rather than  
94 including a positive selection cassette, as in Golden GateWAY and GreenGate<sup>13,14</sup>, we opted for  
95 repurposing the FG position to comprise a transcriptional terminator sequence (e.g. pA signals)  
96 or a post-transcriptional element (e.g. WPRE sequence). As a result, DE and EF were adopted  
97 to respectively include a linker sequence and a C-terminal tag instead of a C-terminal tag and  
98 terminator sequence as is the case in GreenGate.

99 Level-1 plasmids contain attL and attR sites that are situated up- and downstream of the TU to  
100 allow LR Multisite Gateway<sup>TM</sup> reactions for assembly of multiple TUs in the final expression  
101 construct (Level-2). We repurposed pEN-L4-AG-R1<sup>15</sup>, pEN-L1-AG-L2<sup>15</sup>, and pEN-R2-AG-L3<sup>16</sup> as

102 Level-1 destination vectors. In addition, we generated pEN-L1-AG-L3 to accommodate combining  
103 two (L4-R1 & L1-L3) or three (L4-R1 & L1-L2 & R2-L3) different TUs within a R4-R3 Level-2  
104 destination vector. As lentiviral transduction still presents one of the most straightforward and  
105 robust methods to stably integrate a transgene into a mammalian cell, we built a Level-2  
106 destination vector, termed pLV-GGW-DEST, by inserting the R4-R3 cassette from pMG426<sup>17</sup>  
107 between the necessary regulatory lentiviral sequences and the 3' long terminal repeat (LTR) of a  
108 3<sup>rd</sup> generation SIN lentiviral vector. Using our mammalian expression-compatible Golden  
109 GateWAY platform, as a proof-of-concept, we assembled a lentiviral vector that expresses  
110 monomeric superfolder (msf)GFP and nuclear mCherry fluorescent reporters, and allows  
111 selection by puromycin after lentiviral transduction (Fig. S1a). Level-0 modules were generated  
112 from in-house constructs or by DNA synthesis. Lentiviral particles were produced and  
113 subsequently used to transduce human SK-N-BE(2)-C and SHEP neuroblastoma cell lines. Both  
114 cell lines conferred puromycin resistance, and the subcellular localization of both fluorescent  
115 signals was consistent with their localization signals (Fig. S1b). This demonstrates our cloning  
116 platform is capable of generating fully custom lentiviral transfer vectors for transgene integration  
117 in mammalian cells.

118 Because lentiviral vectors are recombination-prone<sup>18</sup> and Gateway<sup>TM</sup> reagents are relatively  
119 expensive for high-throughput cloning efforts, we decided to swap the LR recombinase step for a  
120 second BsmBI-based Golden Gate assembly step (Fig. 2). To do so, we generated a high copy  
121 number plasmid with kanamycin resistance that contained BbsI restriction sites to clone between.  
122 We removed two BsmBI restriction sites in the bacterial backbone of the plasmid, and inserted a  
123 W-A-G-X, X-A-G-Y, Y-A-G-Z, or a X-A-G-Z cassette between the BbsI restriction sites. Similar to  
124 the BsaI overhangs, W, X, Y, and Z are unique overhangs that are generated by restriction digest  
125 with BsmBI allowing Golden Gate assembly of higher order plasmids. These overhangs were  
126 chosen based on Potapov et al.<sup>19</sup> for having a high ligation fidelity with T4 DNA ligase and no  
127 observable ligation at possible DNA base pair mismatches with any of the other overhangs.  
128 Similar as pLV-GGW-DEST, we inserted a W-Z cassette between the LTRs of the same lentiviral  
129 vector to construct pLV-W-Z. In addition, we inserted a W-Z cassette between the 5' and 3'  
130 inverted terminal repeats (ITR) of AAT-PB-CG2APtk<sup>20</sup> to allow Golden Gate assembly of  
131 piggyBac transposable vectors for genomic integration in mammalian cells. All A-G and W-Z  
132 cassettes encode a chloramphenicol resistance gene (CmR; *cat* gene) and *ccdB* toxin gene  
133 expressed by a strong, constitutive *lacUV5* bacterial promoter to provide positive or negative  
134 selection, respectively. Moreover, Level-0 and Level-2 vector backbones confer carbenicillin or  
135 ampicillin resistance (AmpR) through expression of a *bla* gene, while Level-1 vector backbones

136 confer kanamycin resistance (KanaR) through expression of an *aph* gene to prevent selection of  
137 transformants containing lower-ordered plasmids within the hierarchy.

### 138 ***T2A split-link design identifies the glucocorticoid receptor interactome***

139 As a first experiment, we performed a T2A split/link proximity labeling screen with TurboID for the  
140 glucocorticoid receptor (GR, gene symbol: *NR3C1*). GR is a nuclear receptor that is sequestered  
141 in the cytoplasm but relocates to the nucleus upon glucocorticoid (GC) binding. There it acts as a  
142 transcription factor to regulate target gene expression. Using our Golden Gate assembly platform,  
143 we generated TurboID-T2A/MUTT2A-GR expression vectors with a dose-dependent doxycycline-  
144 responsive (TRE) promoter (Fig. S2a). These constructs were combined with a second TU  
145 expressing a blasticidine resistance gene within a piggyBac transposon backbone. We tagged  
146 GR N-terminally with V5-TurboID-T2A/MUTT2A, as tagging the C-terminus might impair ligand  
147 binding and thus proper GR function<sup>21</sup>. Human lung epithelial A549 cells constitutively expressing  
148 a tetracycline-inducible transactivator were co-transfected with either T2A or MUTT2A TurboID-  
149 GR constructs, and piggyBac transposase (PBase) to generate stable A549-TurboID-(MUT)T2A-  
150 GR cell populations. As the number of transposition events in the T2A and MUTT2A setup might  
151 be different between both cell lines, we matched expression levels of both transgenes by  
152 assessing a range of doxycycline to equalize the amount of TurboID and GR present in the cell  
153 (Fig. S2b). Indeed, we found 20 ng mL<sup>-1</sup> and 150 ng mL<sup>-1</sup> doxycycline to express an equal amount  
154 of TurboID and biotinylation in the T2A and MUTT2A setups, respectively. We observed no  
155 ribosomal skipping in the MUTT2A cell line, whilst we observed no full length TurboID-GR fusion  
156 proteins in the T2A cell line (Fig. S2b). At these near-physiological expression levels, we also  
157 observed a similar upregulation of well-known anti-inflammatory GR target genes (*TSC22D3* and  
158 *DUSP1*)<sup>22</sup> upon dexamethasone supplementation, a potent GR agonist, indicating both cell lines  
159 still trigger activation of the same downstream targets and show a comparable GR-dependent  
160 transcriptional transactivation (Fig. S2c).

161 After validating the cell lines, we performed proximity labeling after supplementation of  
162 dexamethasone at the doxycycline concentrations we determined earlier. An outlying replicate  
163 was removed based on principal component analysis (PCA, Fig. S2d). Differential analysis  
164 showed 292 proteins to be significantly enriched in the MUTT2A samples at a 5% FDR (Fig. 3a,  
165 Table S1). We retrieved well-known GR coactivators NCOA2, NCOA3, and NCOA6, as well as  
166 components of chromatin remodeling complexes such as SWI/SNF. iBAQ intensities of  
167 endogenously biotinylated proteins were comparable between both setups, demonstrating similar  
168 enrichment efficiencies (Fig. S2e). Similarly, iBAQ intensities of housekeeping genes (PPIA,

169 TUBB, YWHAZ, GAPDH, VIM) were either comparable or enriched in the T2A setup,  
170 demonstrating the aspecific background was consistent between both setups (Fig. S2f). In  
171 contrast, we identified a significant enrichment of TurboID in the MUTT2A samples (Fig. 3a),  
172 something we previously also saw in our TP53-T2A/MUTT2A-BioID study<sup>10</sup>. We performed gene  
173 set enrichment analysis (GSEA) preranked by LOG2FC with the BioID data of Lempiainen et al.  
174 <sup>23</sup> and Dendoncker et al. <sup>24</sup> as gene sets (Fig. 3b). Interactors identified in both studies were  
175 significantly enriched in our data set (Table S1, adj. P-value =  $2.07 \times 10^{-9}$  and  $2.07 \times 10^{-9}$ ,  
176 respectively), highlighting our results are consistent with previous proximity biotinylation  
177 interactome studies performed for GR. Moreover, we queried the interactors to the C2 (v2023.1)  
178 and C5 (v2023.1) collection of the Molecular Signatures Database (MSigDB). Overrepresented  
179 pathways in our data were in line with previously published results, such as crosstalk with  
180 PPAR $\alpha$ <sup>25,26</sup> and AR<sup>23</sup>, or GR's known role in circadian biology<sup>27-29</sup> (Fig. 3c). Top overrepresented  
181 ontology terms included the mediator complex and RNAPII preinitiation complex assembly (Fig.  
182 3c), terms expected to be overrepresented for an active transcription factor.

### 183 ***SARS-CoV-2 nucleocapsid protein interactors are enriched for stress granule components***

184 After applying our T2A split-link design to GR, we applied the same setup to SARS-CoV-2  
185 nucleocapsid protein (NCAP). NCAP binds and shields the viral genome of SARS-CoV-2, and  
186 has been shown to counter antiviral host responses upon infection<sup>30</sup>. Moreover, multiple studies<sup>31-  
187 33</sup> and preprints<sup>34,35</sup> have provided an NCAP interactome by proximity labeling, allowing us to  
188 compare with our T2A split-link design. Using our Golden Gate assembly platform, we generated  
189 both N- and C-terminally (MUT)T2A-TurboID-tagged NCAP piggyBac-compatible constructs (Fig.  
190 S3a) and stably integrated them in A549 cells that expressed the tetracycline-inducible  
191 transactivation machinery. Similar as for GR, all constructs were under the control of a  
192 doxycycline-inducible promoter and expression levels were assessed by immunoblotting over a  
193 range of doxycycline. We observed that C-terminal tagged T2A and MUTT2A NCAP setups did  
194 not contain comparable amounts of TurboID which was also reflected in differing amounts of  
195 biotinylation between the T2A and MUTT2A setups (Fig. S3b). Therefore, we proceeded with the  
196 N-terminally tagged cell lines for further experiments (Fig. S3c). We found 25 ng mL<sup>-1</sup> doxycycline  
197 to have equal amounts of biotinylation and used this concentration for all subsequent  
198 experiments. Interestingly, at this concentration TurboID amounts seemed slightly lower in the  
199 MUTT2A setup. However, we observed additional TurboID staining at a lower molecular weight,  
200 consistent with previously reported alternative N-terminal processing of NCAP by cellular

201 proteases<sup>36</sup>. The combined pool of TurboID is very likely similar between both setups and  
202 corroborates the equal amounts of biotinylation.

203 Next, we performed proximity labeling with the conditions as described above. An outlying  
204 replicate was removed based on PCA analysis (Fig. S3d). Differential analysis between the T2A  
205 and MUTT2A setups resulted in 51 significantly enriched proteins at a 5% FDR (Fig. 4a, Table  
206 S2). With the exception of ACACA, iBAQ intensities of endogenously biotinylated proteins (Fig.  
207 S3e) and house-keeping genes (Fig. S3f) were comparable between both setups, demonstrating  
208 similar enrichment efficiencies and a similar aspecific background. Similar as with GR, we saw a  
209 significant enrichment of TurboID in the MUTT2A compared to the T2A condition (Fig. 4a). Using  
210 GSEA, we compared our results with other proximity labeling studies for NCAP and found our  
211 NCAP interactors to be significantly enriched (Table S2, adj. P-value =  $2.4 \times 10^{-9}$ ,  $2.7 \times 10^{-8}$ ,  $8.6$   
212  $\times 10^{-8}$ ,  $2.8 \times 10^{-5}$ , and 0.002 for Laurent *et al.*<sup>35</sup>, Liu *et al.*<sup>31</sup>, Samavarchi-Tehrani *et al.*<sup>34</sup>, May *et*  
213 *al.*<sup>33</sup> and Zhang *et al.*<sup>37</sup>, respectively) in these studies (Fig. 4b). Core stress granule (SG)  
214 components were among the most significantly enriched proteins. Moreover, we also identified  
215 GSK3B, a subunit of the GSK3 kinase that is known to phosphorylate NCAP<sup>38,39</sup>. These results  
216 are consistent with previous PPI studies and NCAP's function to attenuate the antiviral innate  
217 immune response by preventing SG formation and RIG-I-like receptor signaling activation<sup>40,41</sup>.

### 218 **T2A split-link identifies SARS-CoV-2 NSP7 interactors**

219 As a final model, we applied our T2A split-link approach on SARS-CoV-2 non-structural protein 7  
220 (NSP7). NSP7 is a 83 amino acid polypeptide that plays an integral role in the transcription of the  
221 viral genome. Together with NSP8 and NSP12, it forms the RNA-dependent RNA polymerase  
222 (RdRp) supercomplex. Similarly to NCAP, we integrated and assessed N- and C-terminal NSP7-  
223 TurboID fusions with a T2A or MUTT2A setup in A549-tetracycline inducible transactivator cells  
224 (Fig. S4a). For N-terminal fusion proteins, we observed the expected bands (Fig. S4b), while C-  
225 terminal fusions expressed poorly with barely any detectable expression in the MUTT2A setup  
226 (Fig. S4c). Biotinylation patterns demonstrated a similar trend (Fig. S4b,c). We did not observe a  
227 doxycycline-dependent increase for the N-terminal fusion in either protein expression or  
228 biotinylation patterns, with an overall higher expression in the T2A setup (Fig. S4c). This suggests  
229 that the operator sites of the TRE promoter were saturated even at the lowest doxycycline  
230 concentration, consistent with a low amount of integrations. Therefore, both setups were induced  
231 with  $25 \text{ ng mL}^{-1}$  doxycycline for any downstream experiments.



232 After removal of outlying replicates by PCA (Fig. S4d), differential analysis found 23 significantly  
233 enriched proteins at a 5% FDR (Fig. 5a, Table S3). Both endogenously biotinylated proteins (Fig.  
234 S4e) and house-keeping proteins (Fig. S4f) were comparable between both setups,  
235 demonstrating similar amounts of enrichment and a common aspecific background in both setups.  
236 Except for the data set of Samavarchi-Tehrani et al.<sup>42</sup>, the small amount of enriched proteins,  
237 and, therefore, small overlap did not allow us to perform a GSEA comparison with other proximity  
238 labeling studies found in BioGRID. Nonetheless, there was a small yet significant (Table S3, adj.  
239 P-value = 0.005) overlap between Samavarchi-Tehrani *et al.*<sup>42</sup> and proteins enriched in the  
240 MUTT2A setup of our data set (Fig. 5b). Consistent with literature<sup>43-45</sup>, enriched MSigDB c2 and  
241 c5 gene sets included sets involved in mitochondrial metabolism and several metabolic  
242 processes, respectively (Fig. 5c).

### 243 ***Subcellular localization of TurboID and the POI determine differences in T2A differential*** 244 ***proteins***

245 We noticed that our NCAP and NSP7 data sets overall contained more differential proteins in the  
246 T2A setup compared to our GR data set (Fig. S5a). Moreover, overlapping significant proteins  
247 enriched in each T2A setup demonstrates the T2A enriched proteomes are more similar between  
248 NCAP and NSP7 (Fig. S5b). In contrast, the overlap with the GR experiment was very limited.  
249 We wondered whether differences in subcellular localization of the TurboID biotin ligase in the  
250 T2A compared to the MUTT2A cell line can explain T2A differences between differential analyses  
251 for different POIs. Therefore, we mapped the subcellular localization of all significant proteins  
252 based on the immunofluorescence data of the Human Protein Atlas. Indeed, most of the  
253 significantly differential proteins in the T2A setup of our NCAP and NSP7 data sets were nuclear  
254 (Fig. S5c). In contrast, in our GR experiment most of the significant proteins in the T2A setup  
255 were cytosolic. Interestingly, for the MUTT2A side we generally observed the opposite, with most  
256 of the significant proteins being nuclear or cytosolic for GR and NCAP, respectively. For NSP7,  
257 the amount of significantly differential proteins in the MUTT2A setup is too low to make definite  
258 conclusions. We hypothesized that free TurboID (as in the T2A setup) would be present in both  
259 compartments, while in the MUTT2A setup, the subcellular localization would be based on the  
260 POI. Consistent with these observations, we and others have previously shown that the BirA\*  
261 biotin ligase can passively diffuse into the nucleus<sup>10,46</sup>, which our data here would suggest is also  
262 the case for free TurboID. Indeed, NCAP and NSP7 reside mostly in the cytosol<sup>38,40,47</sup>, while  
263 dexamethasone-activated GR would be solely nuclear. To substantiate our claims, we performed  
264 immunofluorescence experiments on T2A/MUTT2A cell lines for GR and NCAP (Fig. S5d). In

265 either T2A cell line, we saw a clear distribution of free TurboID over the entirety of the cell, while  
266 for MUTT2A the subcellular localization of TurboID was dependent on the POI. Dexamethasone-  
267 activated GR restricted TurboID and, therefore, biotinylation to the nucleus, while the NCAP fusion  
268 protein and biotinylation activity were only observed in the cytosol. Taken together, we argue that  
269 the observed T2A skew in our data can be explained by differential TurboID localization between  
270 the T2A and MUTT2A setup. In addition, our GR data did not demonstrate a similar skew, which  
271 is in line with an activated transcription factor residing in the nucleus.

### 272 ***MUTT2A/T2A differential analysis recapitulates a stable BioID background***

273 To assess whether a comparable background in our T2A/MUTT2A setup compared to other BioID  
274 experiments can be retrieved, we looked at the iBAQ intensities of TOP1, PARP1, PKM, PRKDC,  
275 FLNA, EEF1A1, and AHNAK proteins. These were previously described as commonly identified  
276 BioID background proteins<sup>48,49</sup>, typically found to be highly abundant in BioID-only samples. For  
277 all proteins in both data sets, the iBAQ intensities were either significantly higher in the T2A  
278 condition or were not significantly different (Fig. 6a). This shows the background in our data sets  
279 are consistent with the BioID-only background observed in classical BioID experiments. For  
280 NCAP, we did not identify TOP1 in any of the T2A or MUTT2A samples. To extend observations  
281 beyond these few proteins, we integrated the BioID CRAPome<sup>50</sup>. The CRAPome was filtered to  
282 contain proteins that are identified in at least 25 out of 30 experiments with an average spectral  
283 count of 3 across all BioID experiments. This provided us with 382 proteins that are consistently  
284 identified in BioID experiments. Of note, of the aforementioned proteins TOP1 and PRKDC did  
285 not make it into this list, due to being identified in 16 and 23 out of 30 experiments, respectively.  
286 In addition, TOP1 had an average spectral count of 2.75 across all experiments, below our cutoff  
287 of 3. We then ranked our data sets based on enrichment and assessed the distribution of these  
288 382 proteins within our data sets. For all data sets, most CRAPome proteins were distributed  
289 around a LOG2FC of 0, indicating that these proteins reside within the stable background (Fig.  
290 6b). The data demonstrates that our T2A control allows efficient filtering of the same stable  
291 background as seen in other BioID experiments.

## 292 **DISCUSSION**

293 Proximity labeling proteomics provides a powerful approach to identify protein-protein interactions  
294 in a wide variety of both *in vitro* and *in vivo* settings. However, only a limited amount of studies  
295 have sought to expand the toolbox beyond classically-used Flp-In 293T-Rex cells. Yet to expand  
296 proximity labeling to more relevant cellular settings, other integration methods are preferred as  
297 Flp-In requires pre-engineered cell lines which can be tedious to develop. Although alternative

298 integration methods have been explored previously<sup>42,51</sup>, these studies, understandably, built  
299 BioID-compatible vectors for their own experimental questions based on classical ‘copy-paste’  
300 cloning efforts. To accommodate these shortcomings, Samavarchi-Tehrani *et al.*<sup>42</sup> built a set of  
301 lentiviral transfer vectors that allow N- and C-terminal tagging of the protein-of-interest (POI) with  
302 BirA\*. Although these vectors are a major advancement in the field, they lack the possibility of a  
303 customizable design and assembly. Haldeman *et al.*<sup>52</sup> built a Gateway<sup>TM</sup>-based modular cloning  
304 system that encompasses BioID2 and APEX labeling enzymes. However, inherent to Gateway<sup>TM</sup>  
305 cloning are large scar sequences that cannot be omitted, the limited number of components that  
306 can be assembled, and the relatively expensive cost of recombinase reagents. These restrictions  
307 hamper throughput and versatility. Therefore, inspired by efforts such as MoClo<sup>53</sup>, here, we built  
308 a two-step Golden Gate-based toolbox for full custom assembly of BioID vectors, not only allowing  
309 to choose promoters, orientation of the proximity labeling enzyme to the POI, positive selection  
310 markers, etc., but also allowing to choose the type of vector backbone depending on the  
311 envisioned application. Although here we only present lentiviral and PB transposon vector  
312 backbones, the system can easily be expanded to accommodate vectors for other types of  
313 delivery or integration (e.g. AAV,  $\Phi$ C31 integrase, Sleeping Beauty, Flp-In) as well as for other  
314 organisms.

315 Today, proximity labeling proteomics acts as a complementary method to classical affinity  
316 purification for the identification of protein interaction partners, yet little effort has been made to  
317 optimize negative controls. This is surprising as a suitable negative control is a prerequisite to do  
318 an adequate quantitative differential analysis. Here, we describe the use of a T2A self-cleaving  
319 peptide as a suitable negative control. By introducing a single point mutation, we engineered a  
320 mutant T2A (MUTT2A) that no longer retains the capacity to cause ribosomal skipping. Recently,  
321 Sears *et al.*<sup>48</sup> reiterated good practices for BioID experiments, which includes a BioID-only control  
322 to filter for stochastic background interactions. Our T2A split-link extends upon the BioID-only  
323 control and allows to co-express the biotin ligase and the POI at equimolar amounts yet physically  
324 separated. As such, (quantitative) proteomic changes because of POI (or biotin ligase)  
325 overexpression remain present, while TurboID and POI levels can be evenly matched between  
326 the T2A and MUTT2A setup simply by optimizing doxycycline amounts for both cell lines. Our  
327 results demonstrate the validity of the T2A split-link as we identify known interactors for three  
328 different bait proteins. Notably, Chojnowski *et al.*<sup>54</sup> developed a conceptually similar method  
329 called 2C-BioID in which the biotin ligase and POI are tagged with either part of the chemically  
330 inducible FKBP-FRB oligomerization system. Upon supplementation of rapamycin or a

331 biologically inactive rapalog, the biotin ligase is recruited to the POI, and differential analysis is  
332 performed by comparing supplemented and non-supplemented conditions. As such the biotin  
333 ligase itself does not interfere with proper POI localization. Moreover, the same cell line can be  
334 used for both conditions, whereas our T2A split-link needs at least two engineered cell lines.  
335 Nonetheless, both methods complement each other's flaws. While 2C-BioID mainly addresses  
336 localization issues, T2A split-link does not require a chemical supplement which can perturb the  
337 behavior of the cell nor does it require the biotin ligase to be recruited. We demonstrate that  
338 differential analysis of MUTT2A compared to T2A generates a stable background as evidenced  
339 by the representation of proteins that are known to be highly abundant in BioID experiments.  
340 Interestingly, TurboID itself was always significantly enriched in the MUTT2A condition, which we  
341 also observed previously in our endogenous p53-(MUT)T2A-BioID<sup>10</sup>. Although seemingly  
342 counterintuitive, the difference in bait size between the MUTT2A and T2A setup very likely  
343 explains these observations. As the fusion protein in the MUTT2A setup represents an amount of  
344 biotinylatable amino acids that is larger compared to TurboID alone, as in the T2A setup, a higher  
345 degree of self-biotinylation and thus enrichment would be expected in the MUTT2A samples. This  
346 would be consistent with the significant yet overall modest enrichment of TurboID in our NSP7  
347 data compared to the other POIs, as NSP7's small size would leave room for only a limited amount  
348 of biotinylatable amino acids.

349 For NCAP and NSP7, we noticed the number of differential proteins was skewed in the T2A  
350 condition compared to the MUTT2A. We reasoned this to be due to a differential localization of  
351 the biotin ligase. Indeed, we observed a higher amount of nuclear proteins in the T2A condition,  
352 likely representing that free TurboID can diffuse into the nucleus, something that was already  
353 shown for other BirA-derived biotin ligases. Here, we show this to also be the case for TurboID.  
354 The impact of this differential localization on the number of known interactors, however, seems to  
355 be relatively limited.

356 Taken together, we provide the interactomics community with a versatile platform for the  
357 generation of proximity ligation tools in a variety of vector backbones. In addition, we expand the  
358 proximity ligation toolbox with a more suitable negative control compared to previously published  
359 options. We demonstrate our T2A split-link approach compares nicely with published data for  
360 three different bait proteins. Finally, we show that our differential analysis of our T2A split-link  
361 concept allows efficient filtering of commonly observed BioID contaminants.

## 362 **STAR METHODS**

### 363 **Resource availability**

364 **Lead contact**

365 Requests for resources and additional information should be directed to and will be fulfilled by the  
366 lead contact, Dr. Sven Eyckerman (sven.eyckerman@ugent.vib.be).

367 **Materials availability**

368 Plasmids generated in this study are available via the BCCM/GeneCorner Plasmid Collection  
369 (genecorner.ugent.be) with accession numbers 13830 to 13835.

370 **Data and code availability**

371 Proteomics data have been deposited to the ProteomeXchange Consortium via the PRIDE  
372 partner repository and are publicly available as of the data of publication. Accession numbers and  
373 reviewer log in data are listed in the key resources table. Uncropped western blots are found in  
374 Fig. S6. Microscopy data reported in this paper will be shared by the lead contact upon request.  
375 This paper does not report original code. Any additional information required to reanalyze the data  
376 reported in this paper is available from the lead contact upon request.

377 **Experimental model and subject details**

378 **Cell lines**

379 Human HEK293T and A549 cell lines were cultured in DulBecco's Modified Eagle Medium  
380 (DMEM) supplemented with 10% FBS. Human SK-N-BE(2)-C and SHEP neuroblastoma cell lines  
381 were cultured in Roswell Park Memorial Institute (RPMI) 1640 medium supplemented with 10%  
382 FBS. Parental cell lines were maintained in antibiotic-free conditions, experiments and  
383 transductions were performed with 30 U/mL Penicillin-Streptomycin. Cells were kept under 60-  
384 70% confluency and passaged twice a week. Cells lines were confirmed mycoplasma-free by a  
385 mycoplasma PCR detection kit. Transgenic cell lines were maintained in the same medium as  
386 the parental lines but continuously supplemented with 30 U/mL Penicillin-Streptomycin.  
387 Transgenic lines were regularly pulsed with the appropriate antibiotic for the corresponding  
388 transgene. Cells were maintained at 5% CO<sub>2</sub> on 37°C.

389 **Method details**

390 **Molecular cloning**

391 All backbones contained a dual selection cassette between the BsaI/BsmBI overhangs  
392 expressing a ccdB toxin and a chloramphenicol (*cat*) gene, conferring negative and positive  
393 selecting respectively. These plasmids were propagated in 2T1R, XL-10 Gold or DB3.1

394 competent cells which either contain a *gyrA* R462C conversion or the F' plasmid expressing the  
395 *ccdA* antitoxin, making them resistant to *ccdB* negative selection.

396 To generate level-0 Golden Gate modules, all parts were either cloned by PCR or DNA synthesis  
397 with *BsaI* sites that generate the corresponding overhangs required for the module. Parts were  
398 mixed with their corresponding module vector (pGGAB, pGGBC, pGGCD, pGGDE, pGGEF,  
399 pGGFG) at a 3:1 ratio (w:w) with a minimum of 50 ng of module vector. These mixes were  
400 digested with *BsaI*-HFv2 for 1 h at 37°C in 1X CutSmart buffer. After digestion, the reaction was  
401 stopped by heating to 80°C for 20 min. Reactions were cooled to room temperature, and 1X T4  
402 ligase buffer and 1 uL T4 DNA ligase was spiked in the reaction mixture. Ligation was performed  
403 for at least 1 h up to overnight incubation at room temperature. Ten microliters of the reaction  
404 mixture were chemically transformed in DH10B and selected on LB agar plates containing 50 ug  
405 mL<sup>-1</sup> carbenicillin. Colonies were screened by colony PCR with GoTaq G2 master mix and a  
406 diagnostic restriction digest with *EcoRI* and *HindIII*. Positive clones were sequence-verified by  
407 Sanger sequencing.

408 Level-1 backbone plasmids were generated as indicated in the main text. Level-1 plasmids were  
409 assembled by combining 100 ng of each part with 100 ng of backbone, 1 mM ATP, 200 U T4 DNA  
410 ligase, 10 U *BsaI*-HFv2, and 1X CutSmart buffer in a total volume of 15 uL. Assemblies were  
411 cycled for 20 cycles for 2 min at 37°C and 2 min at 16°C, followed by 5 min at 50°C and finally 5  
412 min at 80°C to stop the reaction. Ten microliters of the assembly were chemically transformed in  
413 DH10B competent cells and selected on LB agar plates containing 50 ug mL<sup>-1</sup> kanamycin.  
414 Colonies were screened with a diagnostic restriction digest depending on the assembled parts.

415 Lentiviral and piggyBac backbone vectors were generated as indicated in the main text. For  
416 plasmids generated by GGW, 75 ng of at least two level-1 plasmids and one backbone plasmid  
417 with compatible attL/R gateway sites was combined with 1X LR recombinase, and TE buffer (pH  
418 8.0) in a total volume of 10 uL. Mixtures were incubated overnight at 25°C. One microliter  
419 proteinase K was added for 10 min at 37°C to stop the reaction. For *BsmBI*-based Golden Gate  
420 assembly, 100 ng of at least two level-1 plasmids and one backbone plasmid was combined with  
421 1X T4 DNA ligase buffer, 200 U T4 DNA ligase, and 10 U *BsmBI*-v2 in a total volume of 15 uL.  
422 Assemblies were incubated for 30 cycles with 2 min at 42°C and 2 min at 16°C, one cycle of 5  
423 min at 60°C, and finally one cycle of 5 min at 80°C to stop the reaction. In both cases, 10 uL of  
424 the reaction were chemically transformed in DH10B or Stbl3 competent cells, and selected on LB  
425 agar plates containing 50 ug mL<sup>-1</sup> carbenicillin. Clones were screened with a diagnostic restriction  
426 digest depending on the assembled parts.

## 427 **Lentivirus production and transduction**

428 For lentiviral productions,  $6.5 \times 10^6$  HEK293T cells were seeded for calcium phosphate  
429 transfection the next day. Medium was refreshed 30 min to 4 h prior to transfection. The DNA  
430 mixture comprised 24 ug of transfer plasmid, 18 ug pCMV-dR8.74, and 7.2 ug pMD2.G, 75 uL  
431  $\text{CaCl}_2$  (2.5 M) in a total volume of 750 uL in sterile water. The DNA mixture was added dropwise  
432 to 750 uL HEPES-buffered saline (Sigma-Aldrich) while vortexing. The transfection mixture was  
433 incubated 5 min at room temperature, and added to the cells. Next day, a clear calcium phosphate  
434 precipitate was observed and the medium was refreshed to avoid toxicity of the transfection  
435 reagents. The following two days, each day medium containing lentiviral particles was harvested  
436 and kept at 4°C. After the last harvest, both harvests were combined and the medium was spinned  
437 at 500 x g for 5 min at 4°C to pellet cellular debris. Supernatant was filtered through a 0.45 um  
438 filter, and lentiviruses were pelleted by ultracentrifugation for 2.5 h at 85.000 x g at 4°C. Pellets  
439 were redissolved in 100 uL DMEM and aliquoted per 20 uL.

440 To transduce SHEP and SK-N-BE(2)-C neuroblastoma cells,  $1 \times 10^6$  cells were seeded. The day  
441 after seeding, 5 uL concentrated lentivirus was added to the medium. Next day, the medium was  
442 refreshed. Two days post-transduction, 4 and 1 ug  $\text{mL}^{-1}$  puromycin was added to the SK-N-BE(2)-  
443 C and SHEP cells, respectively. One million A549 cells were transduced with a multicomponent  
444 tetracycline-inducible transactivation system at a MOI of 3, expressing a transcriptional repressor  
445 tTS and a transactivator rtTA at equimolar amounts. tTS actively silences the TRE promoter in  
446 the absence of doxycycline but is displaced upon the addition of doxycycline. The rtTA  
447 transactivator acts oppositely when doxycycline is supplemented, actively transcribing genes  
448 inserted downstream of the TRE promoter region. Two days post-transduction, 400 ug  $\text{mL}^{-1}$   
449 hygromycin was added. Optimal puromycin and hygromycin concentrations were determined  
450 prior by serial dilution of the antibiotic for the neuroblastoma cell lines and A549, respectively.  
451 Transduced cells were selected for a minimum of 2 days or 2 weeks for puromycin and  
452 hygromycin, respectively, and until the parental line (under the same selection regime) was no  
453 longer alive.

## 454 **PiggyBac transposition**

455 Twenty thousand A549 tetracycline-inducible transactivator cells were seeded in 500 uL in a 24-  
456 well plate for transfection the next day. A total amount of 500 ng plasmid DNA, comprising 400  
457 ng TurboID plasmid and 100 ng pCMV-hyPBase (Wellcome Trust Sanger Institute<sup>55</sup>), was diluted  
458 to 100 uL with Opti-MEM, after which 0.5 uL PLUS reagent was added. The mixture was incubated  
459 for 10 min at room temperature. Next, 1.5 uL Lipofectamine LTX was added, and incubated for

460 25 min at room temperature after gently mixing. Medium was refreshed with 500 uL antibiotic-free  
461 medium, and the DNA-liposome mixture was added to the cells. Next day, the medium was  
462 refreshed to complete growth medium with antibiotics. One week post-transfection, 5 ug mL<sup>-1</sup>  
463 blasticidin was supplemented to the growth medium for a minimum of 2 weeks, and until the  
464 parental line (under the same selection regime) was no longer alive. The optimal blasticidin  
465 concentration was determined prior by kill curve analysis with a serial dilution of the antibiotic.

#### 466 **SDS-PAGE and western blotting**

467 Thirty micrograms of protein material was measured using Bradford reagent (Bio-Rad Protein  
468 Assay Dye Reagent concentrate #5000006). Each sample was supplemented with 7.5 uL XT  
469 Sample Buffer (Bio-Rad #1610791) and 1.5 uL XT Reducing Agent (Bio-Rad #1610792) in a total  
470 final volume of 30 uL. Samples were heated to 95°C for 10 min, cooled down prior to being loaded  
471 and ran on a 4-12% ExpressPlus PAGE 4-12% pre-cast gel (Genscript M421215) according to  
472 the manufacturer's instructions. Proteins were transferred to PVDF membrane (Merck  
473 #IPFL00010) for 3 h at 60 V in methanol blotting buffer (48 mM Tris-HCl, 39 mM glycine, 0.0375%  
474 SDS (w:v), and 20% methanol (v:v)). Membranes were blocked for 30 min at room temperature  
475 with Odyssey Blocking buffer (LI-COR 927-50000) Primary antibodies were incubated overnight  
476 at 4°C with gentle end-to-end rotation. The following primary antibodies and dilutions in TBS were  
477 used: mouse monoclonal anti-V5 antibody (Invitrogen R960-25) at 1/5000 and rabbit polyclonal  
478 anti-ACTB (Sigma-Aldrich #A2066) at 1/2000. Membranes were washed three times with TBST  
479 for 10 min at room temperature. The following secondary antibodies were used at a dilution of  
480 1/5000: goat polyclonal anti-mouse IgG IRDye 800CW (LI-COR), goat polyclonal anti-rabbit IgG  
481 IRDye 680RD (LI-COR). Membranes were incubated with secondary antibodies for 1 h at room  
482 temperature, washed three times in TBST, and visualized on a LI-COR Odyssey IR scanner. For  
483 streptavidin staining, membranes were washed three times with TBST after visualization and  
484 incubated for 1 h at room temperature with IRDye 680RD Streptavidin (LI-COR) at a 1/50000  
485 dilution. After incubation, membranes were washed once more and biotinylated proteins were  
486 visualized by re-scanning the membrane.

#### 487 **RNA extraction, cDNA synthesis and RT-qPCR**

488 Per condition, 1 X 10<sup>6</sup> cells per well were plated in a 6-well plate. One day after plating, cells were  
489 incubated with the optimized doxycycline concentrations depending on the cell line as indicated  
490 in the main text. Twenty-four hours post-induction cells were lysed on the plate directly by addition  
491 of 350 uL RA1 (Macherey-Nagel, 740961) supplemented with 3.5 uL β-mercaptoethanol. RNA  
492 was extracted from the mixture using the Nucleospin RNA mini kit following the manufacturer's



493 instructions (Macherey-Nagel, 740955). RNA was eluted from the column in 80  $\mu$ L RNase-free  
494 water, and RNA concentration and quality was assessed spectrophotometrically. Two hundred  
495 fifty nanograms of RNA was used for cDNA synthesis using the PrimeScript RT kit (Takara Bio,  
496 RR037A). Primers listed in Table S4 were used to amplify housekeeping genes (SDHA, YWHAZ,  
497 and UBC) and targets-of-interest (TSC22D3 and DUSP1). qPCRs were performed using the  
498 SensiFAST SYBR No-ROX kit (Meridian Bioscience, BIO-98005) consisting of 0.5  $\mu$ L 10  $\mu$ M of  
499 each primer, 5  $\mu$ L 2X SensiFAST SYBR No-ROX mix, and 12.5 ng cDNA. Samples were  
500 measured in technical duplicates. Fluorescent signal was detected using a LightCycler 480  
501 System (Roche). The following cycling conditions were used: 1 cycle at 95°C for 5 min, 40 cycles  
502 at 95°C for 10 s, 60°C for 10 s and 72°C for 10 s, followed by melting curve analysis. Quantitation  
503 cycles (C<sub>q</sub>) of target genes were normalized to all three housekeeping genes using geometric  
504 averaging<sup>56</sup>. The geNorm algorithm was used to calculate stability of housekeeping genes across  
505 samples. All RT-qPCR analyses were performed in qbase+ (CellCarta).

## 506 Proximity labeling

507 For each proximity labeling experiment, three 150 cm<sup>2</sup> plates were seeded with 2.7 x 10<sup>6</sup> cells per  
508 replicate. Next day, optimized doxycycline concentrations as previously described were added to  
509 the corresponding setup. After 24 h, 50  $\mu$ M biotin was added for 1 h. Cells were washed once on  
510 the plate with 10 mL ice-cold PBS, after which cells were collected per replicate by scraping in 750  
511  $\mu$ L ice-cold PBS. Cells were pelleted by spinning for 5 min at 4°C at 500 x g. Pellets were washed  
512 once with 6 mL ice-cold PBS. Pellets were frozen at -20°C until further processing. Subsequently,  
513 cell pellets were resuspended in 5 mL ice-cold RIPA (50 mM Tris-HCl pH 7.5, 150 mM NaCl, 1%  
514 NP-40, 2 mM EDTA, and 0.1% SDS in ddH<sub>2</sub>O), supplemented with 1X cComplete Protease  
515 Inhibitor cocktail and 0.5% sodium deoxycholate. Next, 50 U mL<sup>-1</sup> benzonase was added and  
516 samples were incubated for 1 h at 4°C with end-to-end rotation. Lysates were then sonicated on  
517 ice with a probe sonicated at 30% amplitude for 5 rounds of 6 s burst with 2 s in between rounds.  
518 Lysates were pelleted at 16100 x g for 15 min at 4°C and the supernatant was transferred to a  
519 new tube. Protein concentrations were determined by Bradford assay, and a maximal shared  
520 protein amount across all samples in the same experiment was used as an input for the affinity  
521 precipitation. Per replicate 30  $\mu$ L Streptavidin Sepharose High Performance beads were washed  
522 three times with 600  $\mu$ L unsupplemented ice-cold RIPA and eventually resuspended in 600  $\mu$ L  
523 ice-cold supplemented RIPA buffer. Samples volumes were adjusted to a minimum volume of 4.5  
524 mL, and equilibrated beads were added to each sample. Affinity purification was performed by  
525 incubation at 4°C for 3 h with end-to-end rotation. Next, beads were pelleted by centrifugation for

526 1 min at 500 x g. Beads were washed with 1 mL unsupplemented RIPA buffer. This process was  
527 repeated for a total of three washes, after which beads were washed twice with freshly prepared  
528 ABC buffer (50 mM  $\text{NH}_4\text{HCO}_3$  pH 8.0 in ddH<sub>2</sub>O). Next, beads were washed three times with trypsin  
529 digest buffer (20 mM Tris-HCl pH 8.0 and 2 mM  $\text{CaCl}_2$  in ddH<sub>2</sub>O). Ultimately, beads were  
530 resuspended in 20  $\mu\text{L}$  Tris-HCl pH 8.0, and 1  $\mu\text{g}$  trypsin was added. Samples were incubated  
531 overnight at 37°C. Next morning, beads were pelleted and supernatant was transferred to a new  
532 tube. Another 0.5  $\mu\text{g}$  trypsin was added and samples were incubated for an additional 3 h at 37°C.  
533 Peptide mixtures were acidified with 20% FA to a final concentration of 2% FA. Mixtures were  
534 centrifuged at 20000 x g for 10 min at room temperature, and the supernatant was transferred to  
535 a MS vial. Samples were frozen at -20°C until LC-MS/MS analysis.

### 536 **Confocal imaging**

537 Ten thousand cells per chamber were seeded in an 8-chamber imaging slide. Next day, optimized  
538 doxycycline concentrations were added for 24 h. Two hours prior to fixation 1  $\mu\text{M}$  dexamethasone  
539 was added to T2A-GR and MUTT2A-GR cell lines, and 1 h prior to fixation 50  $\mu\text{M}$  biotin was  
540 added. Half in each chamber was removed and replaced with the same volume of 4% PFA in  
541 PBS for a final concentration of 2% PFA. PFA was pre-warmed to 37°C prior to use. Cells were  
542 incubated at room temperature for 15 min with gentle horizontal shaking. Subsequently, cells  
543 were gently washed three times with PBS, followed by three washing steps with 0.2% Triton X-  
544 100 in PBS for 5 min each to permeabilize the cells. After three more washes with PBS, cells  
545 were blocked for 1 h at room temperature with blocking buffer (0.5% BSA, 0.02% Triton X-100,  
546 1:100-diluted donkey serum in PBS). For V5 staining, cells were incubated overnight with 1:500-  
547 diluted mouse anti-V5 primary antibody in blocking buffer. Next day, cells were washed three  
548 times with PBS before being incubated for 2 h with donkey anti-mouse AlexaFluor 568 secondary  
549 antibody and 1 h with streptavidin DyLight 488. After three PBS washes, cells were stained with  
550 1:1000-diluted DAPI for 15 min at room temperature to stain nuclei. Cells were washed three more  
551 times with PBS and were kept in PBS until confocal imaging. All imaging was performed on a  
552 LSM880 Airyscan with a Plan-Apochromat 63x/1.4 Oil DIC M27. The Airyscan detector was  
553 operated in the super resolution mode of the FastAiryScan. In ZEN Black 2.3 SP1, a pixel  
554 reassignment and 2D wiener deconvolution were carried out post-acquisition. Image processing  
555 was performed in ZEN Blue 3.5 or Fiji.

### 556 **LC-MS/MS and data analysis**

557 For each sample, 2.5  $\mu\text{L}$  peptide mixture was injected for LC-MS/MS analysis on a Ultimate 3000  
558 RSLCnano system (Thermo Fisher Scientific) in line connected to a Q-Exactive-HF Biopharma

559 mass spectrometer (Thermo Fisher Scientific). Trapping was performed 20  $\mu\text{L min}^{-1}$  for 2 min in  
560 loading solvent A (98% ACN, 0.1% TFA) on a 5 mM trapping column (Thermo Fisher Scientific).  
561 Peptide separation was performed on a 250 mm Aurora Ultimate (IonOpticks) at a constant  
562 temperature of 45°C. Peptides were eluted by a non-linear gradient starting at 1% solvent B (80  
563 ACN, 0.1% FA) reaching 33% solvent B in 60 min, 55% in 75 min, 70% in 90 min, followed by a  
564 wash at 70% solvent B for 10 min and re-equilibration with solvent A. The mass spectrometer was  
565 operated in a data-dependent acquisition mode, automatically switching between MS1 and MS2  
566 acquisition for the 12 most abundant ion peaks per MS1 spectrum. Full-scan MS spectra (375 –  
567 1500 m/z) were acquired at a resolution of 60000 in the Orbitrap analyzer after accumulation to a  
568 target value of 3000000. The 12 most intense ions above a threshold of 15000 were isolated for  
569 fragmentation at a normalized collision energy of 30%. The C-trap was filled at a target value of  
570 100000 for maximum 80 ms and the MS2 spectra (200 – 2000 m/z) were acquired at a resolution  
571 of 15000 in the Orbitrap analyzer with a fixed mass of 145 m/z. Only peptides with charge states  
572 ranging from +2 to +6 were included for fragmentation and the dynamic exclusion was set to 12  
573 s.

574 RAW files were searched using the Andromeda search engine with default search settings (1%  
575 FDR at peptide and protein level) as implemented in MaxQuant (v2.3.4.0). Spectra were searched  
576 against the human SwissProt proteome database (version of January 2023). Sequences of V5-  
577 TurboID, SARS-CoV-2 NCAP, and SARS-CoV-2 NSP7 were added to the search database.  
578 Enzyme specificity was set as C-terminal to arginine and lysine (trypsin), also when followed by  
579 a proline, with a maximum of two missed cleavages. Methionine oxidation and N-terminal  
580 acetylation were set as variable modifications. No fixed modifications were set. Matching between  
581 runs was disabled. Only proteins with at least one unique or razor peptide were retained for  
582 identification. Proteins were quantified using the MaxLFQ algorithm with iBAQ turned on.

583 Proteins that are known contaminants, identified as reverse hits, or only identified by site, were  
584 removed from the analysis. iBAQ values were log<sub>2</sub>-transformed and each replicate was median-  
585 normalized. Based on PCA sample clustering, outlying replicates were removed from the analysis.  
586 Proteins only identified in N-1 replicates in either the T2A or MUTT2A condition were retained for  
587 downstream statistical analysis, missing values were imputed by quantile regression with the  
588 imputeLCMD R package. In limma, a linear model was fitted onto the data and differential analysis  
589 was performed by empirical Bayes moderated t-tests with a Benjamini Hochberg correction for  
590 multiple testing. Proteins with an adjusted p-value of less than or equal to 5% were considered  
591 statistically significant.

## 592 Gene set enrichment analysis

593 All GSEA analyses were ran pre-ranked including all quantifiable proteins in the data set. These  
 594 were ranked on the basis of the log2 fold change of their iBAQ values in the MUTT2A versus T2A  
 595 condition. For statistical evaluation, the analyses were ran with 10000 permutations and an FDR  
 596 correction. GSEA was performed with the curated gene sets (C2, v2023.1) and ontology gene  
 597 sets (C5, v2023.1) human collections within the Molecular Signatures Database. GMT files for  
 598 Dendoncker *et al.*<sup>24</sup>, Lempiäinen *et al.*<sup>23</sup>, Laurent *et al.*<sup>35</sup>, Liu *et al.*<sup>31</sup>, May *et al.*<sup>33</sup>, Meyers *et al.*<sup>32</sup>,  
 599 and Samavarchi-Tehrani *et al.*<sup>34</sup> were custom-made based on their data entries in BioGRID (v.4.4)  
 600 for NR3C1, SARS-CoV-2 NCAP, and SARS-CoV-2 NSP7. GSEA analyses and visualization were  
 601 performed using the GSEA function within the clusterProfiler<sup>57</sup> R package.

## 602 Human Protein Atlas subcellular compartment

603 To assess protein subcellular localization, significantly enriched proteins in either the T2A or  
 604 MUTT2A setups were queried against the immunofluorescence data of the Human Protein Atlas  
 605 using the HPAanalyze<sup>58</sup> R package. Proteins assigned to the terms ‘Nucleoplasm’ or ‘Cytosol’  
 606 were used to demonstrate overall enrichment of nuclear or cytosolic proteins in either setup.

## 607 Key resource table

| REAGENT or RESOURCE                                                                  | SOURCE        | IDENTIFIER |
|--------------------------------------------------------------------------------------|---------------|------------|
| Antibodies                                                                           |               |            |
| Rabbit ployclonal anti-ACTB                                                          | Sigma-Aldrich | #A2066     |
| Mouse monoclonal anti-V5                                                             | Invitrogen    | R960-25    |
| IRDye 800CW Goat polyclonal anti-mouse IgG                                           | LI-COR        | 926-32210  |
| IRDye 680RD Goat polyclonal anti-rabbit IgG                                          | LI-COR        | 926-68071  |
| Donkey anti-mouse IgG (H+L) Highly cross-adsorbed secondary antibody Alexa Fluor 568 | Invitrogen    | A10037     |
| Bacterial and virus strains                                                          |               |            |
| Lentivirus: pLV-EF1a-tTS/rtTA_PGK-HygroR                                             | This paper    | N/A        |
| Lentivirus: pLV-EF1a-msfGFP-T2A-mCherry-NLS_PGK-PuroR                                | This paper    | N/A        |
| DH10B <i>E. coli</i> chemically competent cells (in-house made)                      | Thermo        | EC0113     |
| One Shot ccdB Survival 2T1R competent cells                                          | Invitrogen    | A10460     |
| <i>E. coli</i> K12xB DB3.1                                                           | BCCM          | LMBP 4098  |
| XL10-Gold Ultracompetent cells                                                       | Agilent       | 200315     |
| Chemicals, peptides, and recombinant proteins                                        |               |            |
| IRDye 680RD Streptavidin                                                             | LI-COR        | 926-68079  |
| Streptavidin DyLight 488                                                             | Thermo        | #21832     |
| Bsal-HFv2                                                                            | NEB           | R3733L     |
| BsmBI-v2                                                                             | NEB           | R0739L     |
| T4 DNA ligase                                                                        | NEB           | M0202L     |
| T4 DNA ligase                                                                        | Thermo        | #EL0011    |

|                                                                  |                                                 |                                                                         |
|------------------------------------------------------------------|-------------------------------------------------|-------------------------------------------------------------------------|
| ATP                                                              | NEB                                             | P0756L                                                                  |
| Doxycycline hydrochloride                                        | Sigma-Aldrich                                   | D-9891                                                                  |
| Hygromycin B Gold                                                | InvivoGen                                       | Ant-hg-1                                                                |
| Blasticidin                                                      | InvivoGen                                       | Ant-bl-05                                                               |
| Puromycin                                                        | InvivoGen                                       | Ant-pr-1                                                                |
| Carbenicillin disodium                                           | Duchefa Biochemie                               | C0109.0025                                                              |
| Kanamycin sulfate                                                | USBiological                                    | K0010.25                                                                |
| Protein assay dye reagent concentrate                            | Bio-Rad                                         | #5000006                                                                |
| XT Reducing agent                                                | Bio-Rad                                         | #1610792                                                                |
| XT Sample buffer                                                 | Bio-Rad                                         | #1610791                                                                |
| Odyssey Blocking buffer                                          | LI-COR                                          | 927-50000                                                               |
| 2X SensiFAST SYBR No-ROX mix                                     | Meridian Bioscience                             | BIO-98005                                                               |
| Dexamethasone                                                    | Sigma-Aldrich                                   | D4902                                                                   |
| Biotin                                                           | Sigma-Aldrich                                   | B4639                                                                   |
| Benzonase                                                        | Millipore                                       | E1014-5KU                                                               |
| Trypsin                                                          | Promega                                         | V5111                                                                   |
| HEPES-buffered saline                                            | Sigma-Aldrich                                   | 51558-50ML                                                              |
| Calcium chloride dihydrate                                       | Sigma-Aldrich                                   | C7902-1KG                                                               |
| Critical commercial assays                                       |                                                 |                                                                         |
| GoTaq G2 master mix                                              | Promega                                         | M7822                                                                   |
| Gateway LR Clonase II enzyme mix                                 | Invitrogen                                      | 11791020                                                                |
| Lipofectamine LTX reagent with PLUS reagent                      | Invitrogen                                      | A12621                                                                  |
| PrimeScript RT kit                                               | Takara Bio                                      | RR037A                                                                  |
| Nucleospin mini kit for RNA purification                         | Macherey-Nagel                                  | 740955.50                                                               |
| Deposited data                                                   |                                                 |                                                                         |
| Proximity ligation LC-MS/MS raw data and search results for GR   | This paper                                      | PRIDE: PXD046414<br>(reviewer_pxd046414@ebi.ac.uk – password: f86i0cML) |
| Proximity ligation LC-MS/MS raw data and search results for NCAP | This paper                                      | PRIDE: PXD046413<br>(reviewer_pxd046413@ebi.ac.uk – password: OSZ6NlcH) |
| Proximity ligation LC-MS/MS raw data and search results for NSP7 | This paper                                      | PRIDE: PXD046412<br>(reviewer_pxd046412@ebi.ac.uk – password: Hb8VbCeh) |
| Experimental models: Cell lines                                  |                                                 |                                                                         |
| Human: A549                                                      | ATCC                                            | CCL-185                                                                 |
| Human: HEK293T                                                   | ATCC                                            | CRL-3216                                                                |
| Human: SK-N-BE(2)-C                                              | Laboratory of Frank Speleman (Ghent University) | CRL-2268                                                                |
| Human: SHEP                                                      | Laboratory of Frank Speleman (Ghent University) | CVCL_0524                                                               |
| Oligonucleotides                                                 |                                                 |                                                                         |
| Primers for RT-qPCR, see Table S4                                | This paper                                      | N/A                                                                     |

| Recombinant DNA                               |                                     |                                                                                                           |
|-----------------------------------------------|-------------------------------------|-----------------------------------------------------------------------------------------------------------|
| pLV-EF1a-tTS/rtTA_PGK-Hygro                   | VectorBuilder                       | N/A                                                                                                       |
| pPB-TRE-TurboID-T2A-GR_PGK-BlastR             | This paper                          | BCCM/GeneCorner:<br>LMBP 13830                                                                            |
| pPB-TRE-TurboID-MUTT2A-GR_PGK-BlastR          | This paper                          | BCCM/GeneCorner:<br>LMBP 13831                                                                            |
| pPB-TRE-TurboID-T2A-NCAP_PGK-BlastR           | This paper                          | BCCM/GeneCorner:<br>LMBP 13832                                                                            |
| pPB-TRE-TurboID-MUTT2A-NCAP_PGK-BlastR        | This paper                          | BCCM/GeneCorner:<br>LMBP 13883                                                                            |
| pPB-TRE-TurboID-T2A-NSP7_PGK-BlastR           | This paper                          | BCCM/GeneCorner:<br>Accession pending                                                                     |
| pPB-TRE-TurboID-MUTT2A-NSP7_PGK-BlastR        | This paper                          | BCCM/GeneCorner:<br>Accession pending                                                                     |
| pLV-EF1a-msfGFP-T2A-mCherry-NLS_PGK-PuroR     | This paper                          | BCCM/GeneCorner:<br>Accession pending                                                                     |
| pCMV-dR8.74                                   | Laboratory of Didier Trono (EPFL)   | Addgene #22036                                                                                            |
| pMD2.G                                        | Laboratory of Didier Trono (EPFL)   | Addgene #12259                                                                                            |
| pCMV-hyPBase                                  | Yusa <i>et al.</i> <sup>52</sup>    | Wellcome Trust<br>Sanger Institute                                                                        |
| Software and algorithms                       |                                     |                                                                                                           |
| R (v4.4.0)                                    | R Core Team (2022)                  | <a href="https://www.R-project.org/">https://www.R-project.org/</a>                                       |
| R package: limma                              | Ritchie <i>et al.</i> <sup>59</sup> | doi:<br>10.1093/nar/gkv007                                                                                |
| R package: imputeLCMD                         | Lazar <i>et al.</i>                 | <a href="https://CRAN.R-project.org/package=imputeLCMD">https://CRAN.R-project.org/package=imputeLCMD</a> |
| R package: clusterProfiler                    | Wu <i>et al.</i> <sup>57</sup>      | doi:<br>10.1016/j.xinn.2021.100141                                                                        |
| R package: HPAanalyze                         | Tran <i>et al.</i> <sup>58</sup>    | doi:<br>10.1186/s12859-019-3059-z                                                                         |
| R package: ggplot2                            | Wickham <i>et al.</i>               | <a href="https://ggplot2.tidyverse.org">https://ggplot2.tidyverse.org</a>                                 |
| MaxQuant v2.3.4.0                             | Tyanova <i>et al.</i> <sup>60</sup> | <a href="https://www.maxquant.org/">https://www.maxquant.org/</a>                                         |
| ZEN 2.3 Lite                                  | ZEISS                               | N/A                                                                                                       |
| Fiji                                          | Schindelin <i>et al.</i>            | doi:<br>10.1038/nmeth.2019                                                                                |
| qBase+                                        | CellCarta                           | <a href="https://cellcarta.com/genomic-data-analysis/">https://cellcarta.com/genomic-data-analysis/</a>   |
| Other                                         |                                     |                                                                                                           |
| cOmplete protease inhibitor cocktail          | Roche                               | 11697498001                                                                                               |
| Streptavidin Sepharose High Performance Resin | Cytiva                              | 90100484                                                                                                  |

608

609 **Acknowledgements**

610 The authors would like to acknowledge the VIB Proteomics Core and VIB Bioimaging Core Ghent  
611 for their assistance of the work presented in the manuscript. The authors would like to  
612 acknowledge funding support by a UGent BOF post-doctoral mandate to LD (BOF22/PDO/024),  
613 FWO PhD SB fellowships to GDM and LVM, and FWO (G042918N) and UGent BOF  
614 (BOF.GOA.2022.0003.03) projects to SE. The authors declare no competing interests.

#### 615 **Author contributions**

616 LD, GDM, AV, DDS, TVS, and MDM performed experimental work. LD, AV, DDS, and TVS  
617 performed molecular cloning. AV, DDS, and TVS performed BioID and LC-MS/MS sample  
618 preparation. LD and DF performed LC-MS/MS data analysis. LD and GDM performed lentivirus  
619 production and transduction. GDM and MDM performed and analyzed imaging data. LD  
620 performed and analyzed RT-qPCR. LVM, KDB, and TJ provided resources and support. LD,  
621 GDM, MDM, LVM, and SE did experimental design. LD drafted the first version of the manuscript  
622 and figures. All authors read the final manuscript and provided feedback. SE supervised and  
623 conceived the project.

#### 624 **REFERENCES**

- 625 1. Roux, K.J., Kim, D.I., Raida, M., and Burke, B. (2012). A promiscuous biotin ligase fusion protein  
626 identifies proximal and interacting proteins in mammalian cells. *J Cell Biol* *196*, 801-810.  
627 10.1083/jcb.201112098.
- 628 2. Li, X.W., Rees, J.S., Xue, P., Zhang, H., Hamaia, S.W., Sanderson, B., Funk, P.E., Farndale, R.W.,  
629 Lilley, K.S., Perrett, S., and Jackson, A.P. (2014). New Insights into the DT40 B Cell Receptor Cluster  
630 Using a Proteomic Proximity Labeling Assay. *Journal of Biological Chemistry* *289*, 14434-14447.  
631 10.1074/jbc.M113.529578.
- 632 3. Rhee, H.W., Zou, P., Udeshi, N.D., Martell, J.D., Mootha, V.K., Carr, S.A., and Ting, A.Y. (2013).  
633 Proteomic Mapping of Mitochondria in Living Cells via Spatially Restricted Enzymatic Tagging.  
634 *Science* *339*, 1328-1331. 10.1126/science.1230593.
- 635 4. Hill, Z.B., Pollock, S.B., Zhuang, M., and Wells, J.A. (2016). Direct Proximity Tagging of Small  
636 Molecule Protein Targets Using an Engineered NEDD8 Ligase. *J Am Chem Soc* *138*, 13123-13126.  
637 10.1021/jacs.6b06828.
- 638 5. Liu, X., Salokas, K., Tamene, F., Jiu, Y., Weldatsadik, R.G., Ohman, T., and Varjosalo, M. (2018). An  
639 AP-MS- and BioID-compatible MAC-tag enables comprehensive mapping of protein interactions  
640 and subcellular localizations. *Nat Commun* *9*, 1188. 10.1038/s41467-018-03523-2.
- 641 6. Lam, S.S., Martell, J.D., Kamer, K.J., Deerinck, T.J., Ellisman, M.H., Mootha, V.K., and Ting, A.Y.  
642 (2015). Directed evolution of APEX2 for electron microscopy and proximity labeling. *Nature*  
643 *Methods* *12*, 51-54.
- 644 7. Branon, T.C., Bosch, J.A., Sanchez, A.D., Udeshi, N.D., Svinkina, T., Carr, S.A., Feldman, J.L.,  
645 Perrimon, N., and Ting, A.Y. (2018). Efficient proximity labeling in living cells and organisms with  
646 TurboID. *Nature Biotechnology* *36*, 880-+. 10.1038/nbt.4201.
- 647 8. Chu, Q., Rathore, A., Diedrich, J.K., Donaldson, C.J., Yates, J.R., 3rd, and Saghatelian, A. (2017).  
648 Identification of Microprotein-Protein Interactions via APEX Tagging. *Biochemistry* *56*, 3299-3306.  
649 10.1021/acs.biochem.7b00265.

- 650 9. Mili, S., and Steitz, J.A. (2004). Evidence for reassociation of RNA-binding proteins after cell lysis:  
651 implications for the interpretation of immunoprecipitation analyses. *RNA* 10, 1692-1694.  
652 10.1261/rna.7151404.
- 653 10. Vandemoortele, G., De Sutter, D., Moliere, A., Pauwels, J., Gevaert, K., and Eyckerman, S. (2018).  
654 A Well-Controlled BioID Design for Endogenous Bait Proteins. *J Proteome Res.*  
655 10.1021/acs.jproteome.8b00367.
- 656 11. Donnelly, M.L.L., Luke, G., Mehrotra, A., Li, X.J., Hughes, L.E., Gani, D., and Ryan, M.D. (2001).  
657 Analysis of the aphthovirus 2A/2B polyprotein 'cleavage' mechanism indicates not a proteolytic  
658 reaction, but a novel translational effect: a putative ribosomal 'skip'. *J Gen Virol* 82, 1013-1025.  
659 Doi 10.1099/0022-1317-82-5-1013.
- 660 12. Liu, Z., Chen, O., Wall, J.B.J., Zheng, M., Zhou, Y., Wang, L., Vaseghi, H.R., Qian, L., and Liu, J. (2017).  
661 Systematic comparison of 2A peptides for cloning multi-genes in a polycistronic vector. *Sci Rep* 7,  
662 2193. 10.1038/s41598-017-02460-2.
- 663 13. Kirchmaier, S., Lust, K., and Wittbrodt, J. (2013). Golden GATEway cloning--a combinatorial  
664 approach to generate fusion and recombination constructs. *PLoS One* 8, e76117.  
665 10.1371/journal.pone.0076117.
- 666 14. Lampropoulos, A., Sutikovic, Z., Wenzl, C., Maegele, I., Lohmann, J.U., and Forner, J. (2013).  
667 GreenGate---a novel, versatile, and efficient cloning system for plant transgenesis. *PLoS One* 8,  
668 e83043. 10.1371/journal.pone.0083043.
- 669 15. Houbaert, A., Zhang, C., Tiwari, M., Wang, K., de Marcos Serrano, A., Savatin, D.V., Urs, M.J.,  
670 Zhiponova, M.K., Gudesblat, G.E., Vanhoutte, I., et al. (2018). POLAR-guided signalling complex  
671 assembly and localization drive asymmetric cell division. *Nature* 563, 574-578. 10.1038/s41586-  
672 018-0714-x.
- 673 16. Hu, Z., Zhang, T., Rombaut, D., Decaestecker, W., Xing, A., D'Haeyer, S., Hofer, R., Vercauteren, I.,  
674 Karimi, M., Jacobs, T., and De Veylder, L. (2019). Genome Editing-Based Engineering of CESA3 Dual  
675 Cellulose-Inhibitor-Resistant Plants. *Plant Physiol* 180, 827-836. 10.1104/pp.18.01486.
- 676 17. Durand, A.N., Moses, T., De Clercq, R., Goossens, A., and Pauwels, L. (2012). A MultiSite Gateway  
677 (TM) vector set for the functional analysis of genes in the model *Saccharomyces cerevisiae*. *Bmc*  
678 *Molecular Biology* 13. Artn 3010.1186/1471-2199-13-30.
- 679 18. Urbinati, F., Arumugam, P., Higashimoto, T., Perumbeti, A., Mitts, K., Xia, P., and Malik, P. (2009).  
680 Mechanism of reduction in titers from lentivirus vectors carrying large inserts in the 3'LTR. *Mol*  
681 *Ther* 17, 1527-1536. 10.1038/mt.2009.89.
- 682 19. Potapov, V., Ong, J.L., Kucera, R.B., Langhorst, B.W., Bilotti, K., Pryor, J.M., Cantor, E.J., Canton, B.,  
683 Knight, T.F., Evans, T.C., Jr., and Lohman, G.J.S. (2018). Comprehensive Profiling of Four Base  
684 Overhang Ligation Fidelity by T4 DNA Ligase and Application to DNA Assembly. *ACS Synth Biol* 7,  
685 2665-2674. 10.1021/acssynbio.8b00333.
- 686 20. Eggenschwiler, R., Moslem, M., Fraguas, M.S., Galla, M., Papp, O., Naujock, M., Fonfara, I., Gensch,  
687 I., Wahner, A., Beh-Pajooh, A., et al. (2016). Improved bi-allelic modification of a transcriptionally  
688 silent locus in patient-derived iPSC by Cas9 nickase. *Sci Rep* 6, 38198. 10.1038/srep38198.
- 689 21. Weikum, E.R., Knuesel, M.T., Ortlund, E.A., and Yamamoto, K.R. (2017). Glucocorticoid receptor  
690 control of transcription: precision and plasticity via allostery. *Nat Rev Mol Cell Biol* 18, 159-174.  
691 10.1038/nrm.2016.152.
- 692 22. Van Moortel, L., Thommis, J., Maertens, B., Staes, A., Clarisse, D., De Sutter, D., Libert, C., Meijer,  
693 O.C., Eyckerman, S., Gevaert, K., and De Bosscher, K. (2022). Novel assays monitoring direct  
694 glucocorticoid receptor protein activity exhibit high predictive power for ligand activity on  
695 endogenous gene targets. *Biomedicine & pharmacotherapy = Biomedecine & pharmacotherapie*  
696 152, 113218. 10.1016/j.biopha.2022.113218.



- 697 23. Lempiainen, J.K., Niskanen, E.A., Vuoti, K.M., Lampinen, R.E., Goos, H., Varjosalo, M., and Palvimo,  
698 J.J. (2017). Agonist-specific Protein Interactomes of Glucocorticoid and Androgen Receptor as  
699 Revealed by Proximity Mapping. *Mol Cell Proteomics* 16, 1462-1474. 10.1074/mcp.M117.067488.
- 700 24. Dendoncker, K., Timmermans, S., Vandewalle, J., Eggermont, M., Lempiainen, J., Paakinaho, V.,  
701 Van Hamme, E., Dewaele, S., Vandevyver, S., Ballegeer, M., et al. (2019). TNF-alpha inhibits  
702 glucocorticoid receptor-induced gene expression by reshaping the GR nuclear cofactor profile.  
703 *Proc Natl Acad Sci U S A* 116, 12942-12951. 10.1073/pnas.1821565116.
- 704 25. Bougarne, N., Paumelle, R., Caron, S., Henuyer, N., Mansouri, R., Gervois, P., Staels, B.,  
705 Haegeman, G., and De Bosscher, K. (2009). PPARalpha blocks glucocorticoid receptor alpha-  
706 mediated transactivation but cooperates with the activated glucocorticoid receptor alpha for  
707 transrepression on NF-kappaB. *Proc Natl Acad Sci U S A* 106, 7397-7402.  
708 10.1073/pnas.0806742106.
- 709 26. Lee, H.Y., Gao, X., Barrasa, M.I., Li, H., Elmes, R.R., Peters, L.L., and Lodish, H.F. (2015). PPAR-alpha  
710 and glucocorticoid receptor synergize to promote erythroid progenitor self-renewal. *Nature* 522,  
711 474-477. 10.1038/nature14326.
- 712 27. Lamia, K.A., Papp, S.J., Yu, R.T., Barish, G.D., Uhlenhaut, N.H., Jonker, J.W., Downes, M., and Evans,  
713 R.M. (2011). Cryptochromes mediate rhythmic repression of the glucocorticoid receptor. *Nature*  
714 480, 552-556. 10.1038/nature10700.
- 715 28. So, A.Y., Bernal, T.U., Pillsbury, M.L., Yamamoto, K.R., and Feldman, B.J. (2009). Glucocorticoid  
716 regulation of the circadian clock modulates glucose homeostasis. *Proc Natl Acad Sci U S A* 106,  
717 17582-17587. 10.1073/pnas.0909733106.
- 718 29. Nader, N., Chrousos, G.P., and Kino, T. (2009). Circadian rhythm transcription factor CLOCK  
719 regulates the transcriptional activity of the glucocorticoid receptor by acetylating its hinge region  
720 lysine cluster: potential physiological implications. *FASEB J* 23, 1572-1583. 10.1096/fj.08-117697.
- 721 30. Wu, W.B., Cheng, Y., Zhou, H., Sun, C.Z., and Zhang, S.J. (2023). The SARS-CoV-2 nucleocapsid  
722 protein: its role in the viral life cycle, structure and functions, and use as a potential target in the  
723 development of vaccines and diagnostics. *Virology* 610.1186/s12985-023-01968-6.
- 724 31. Liu, X., Huuskonen, S., Laitinen, T., Redchuk, T., Bogacheva, M., Salokas, K., Pohner, I., Ohman, T.,  
725 Tonduru, A.K., Hassinen, A., et al. (2021). SARS-CoV-2-host proteome interactions for antiviral  
726 drug discovery. *Mol Syst Biol* 17, e10396. 10.15252/msb.202110396.
- 727 32. Meyers, J.M., Ramanathan, M., Shanderson, R.L., Beck, A., Donohue, L., Ferguson, I., Guo, M.G.,  
728 Rao, D.S., Miao, W., Reynolds, D., et al. (2021). The proximal proteome of 17 SARS-CoV-2 proteins  
729 links to disrupted antiviral signaling and host translation. *PLoS Pathog* 17, e1009412.  
730 10.1371/journal.ppat.1009412.
- 731 33. May, D.G., Martin-Sancho, L., Anschau, V., Liu, S., Chrisopoulos, R.J., Scott, K.L., Halfmann, C.T., Diaz  
732 Pena, R., Pratt, D., Campos, A.R., and Roux, K.J. (2022). A BioID-Derived Proximity Interactome for  
733 SARS-CoV-2 Proteins. *Viruses* 14. 10.3390/v14030611.
- 734 34. Samavarchi-Tehrani, P., Abdouni, H., Knight, J.D.R., Astori, A., Samson, R., Lin, Z.-Y., Kim, D.-K.,  
735 Knapp, J.J., St-Germain, J., Go, C.D., et al. (2020). A SARS-CoV-2 – host proximity interactome.  
736 bioRxiv, 2020.2009.2003.282103. 10.1101/2020.09.03.282103.
- 737 35. Laurent, E.M.N., Sofianatos, Y., Komarova, A., Gimeno, J.-P., Tehrani, P.S., Kim, D.-K., Abdouni, H.,  
738 Duhamel, M., Cassonnet, P., Knapp, J.J., et al. (2020). Global BioID-based SARS-CoV-2 proteins  
739 proximal interactome unveils novel ties between viral polypeptides and host factors involved in  
740 multiple COVID19-associated mechanisms. bioRxiv, 2020.2008.2028.272955.  
741 10.1101/2020.08.28.272955.
- 742 36. Meyer, B., Chiaravalli, J., Gellenoncourt, S., Brownridge, P., Bryne, D.P., Daly, L.A., Grauslys, A.,  
743 Walter, M., Agou, F., Chakrabarti, L.A., et al. (2021). Characterising proteolysis during SARS-CoV-

- 744 2 infection identifies viral cleavage sites and cellular targets with therapeutic potential. *Nat*  
745 *Commun* *12*, 5553. 10.1038/s41467-021-25796-w.
- 746 37. Zhang, Y., Shang, L., Zhang, J., Liu, Y., Jin, C., Zhao, Y., Lei, X., Wang, W., Xiao, X., Zhang, X., et al.  
747 (2022). An antibody-based proximity labeling map reveals mechanisms of SARS-CoV-2 inhibition  
748 of antiviral immunity. *Cell Chem Biol* *29*, 5-18 e16. 10.1016/j.chembiol.2021.10.008.
- 749 38. Lu, S., Ye, Q., Singh, D., Cao, Y., Diedrich, J.K., Yates, J.R., 3rd, Villa, E., Cleveland, D.W., and Corbett,  
750 K.D. (2021). The SARS-CoV-2 nucleocapsid phosphoprotein forms mutually exclusive condensates  
751 with RNA and the membrane-associated M protein. *Nat Commun* *12*, 502. 10.1038/s41467-020-  
752 20768-y.
- 753 39. Yaron, T.M., Heaton, B.E., Levy, T.M., Johnson, J.L., Jordan, T.X., Cohen, B.M., Kerelsky, A., Lin,  
754 T.Y., Liberatore, K.M., Bulaon, D.K., et al. (2022). Host protein kinases required for SARS-CoV-2  
755 nucleocapsid phosphorylation and viral replication. *Sci Signal* *15*, eabm0808.  
756 10.1126/scisignal.abm0808.
- 757 40. Zheng, Y., Deng, J., Han, L., Zhuang, M.W., Xu, Y., Zhang, J., Nan, M.L., Xiao, Y., Zhan, P., Liu, X., et  
758 al. (2022). SARS-CoV-2 NSP5 and N protein counteract the RIG-I signaling pathway by suppressing  
759 the formation of stress granules. *Signal Transduct Target Ther* *7*, 22. 10.1038/s41392-022-00878-  
760 3.
- 761 41. Nabeel-Shah, S., Lee, H., Ahmed, N., Burke, G.L., Farhangmehr, S., Ashraf, K., Pu, S., Braunschweig,  
762 U., Zhong, G., Wei, H., et al. (2022). SARS-CoV-2 nucleocapsid protein binds host mRNAs and  
763 attenuates stress granules to impair host stress response. *iScience* *25*, 103562.  
764 10.1016/j.isci.2021.103562.
- 765 42. Samavarchi-Tehrani, P., Abdouni, H., Samson, R., and Gingras, A.C. (2018). A Versatile Lentiviral  
766 Delivery Toolkit for Proximity-dependent Biotinylation in Diverse Cell Types. *Mol Cell Proteomics*  
767 *17*, 2256-2269. 10.1074/mcp.TIR118.000902.
- 768 43. Archer, S.L., Dasgupta, A., Chen, K.H., Wu, D., Baid, K., Mamatis, J.E., Gonzalez, V., Read, A.,  
769 Bentley, R.E., Martin, A.Y., et al. (2022). SARS-CoV-2 mitochondriopathy in COVID-19 pneumonia  
770 exacerbates hypoxemia. *Redox Biol* *58*, 102508. 10.1016/j.redox.2022.102508.
- 771 44. Ramachandran, K., Maity, S., Muthukumar, A.R., Kandala, S., Tomar, D., Abd El-Aziz, T.M., Allen,  
772 C., Sun, Y., Venkatesan, M., Madaris, T.R., et al. (2022). SARS-CoV-2 infection enhances  
773 mitochondrial PTP complex activity to perturb cardiac energetics. *iScience* *25*, 103722.  
774 10.1016/j.isci.2021.103722.
- 775 45. Moolamalla, S.T.R., Balasubramanian, R., Chauhan, R., Priyakumar, U.D., and Vinod, P.K. (2021).  
776 Host metabolic reprogramming in response to SARS-CoV-2 infection: A systems biology approach.  
777 *Microb Pathogenesis* *158*. ARTN 10511410.1016/j.micpath.2021.105114.
- 778 46. Mehus, A.A., Anderson, R.H., and Roux, K.J. (2016). BioID Identification of Lamin-Associated  
779 Proteins. *Methods Enzymol* *569*, 3-22. 10.1016/bs.mie.2015.08.008.
- 780 47. Wang, J., Shi, C.R., Xu, Q., and Yin, H. (2021). SARS-CoV-2 nucleocapsid protein undergoes liquid-  
781 liquid phase separation into stress granules through its N-terminal intrinsically disordered region.  
782 *Cell Discov* *7*. ARTN 510.1038/s41421-020-00240-3.
- 783 48. Sears, R.M., May, D.G., and Roux, K.J. (2019). BioID as a Tool for Protein-Proximity Labeling in  
784 Living Cells. In *Enzyme-Mediated Ligation Methods*, T. Nuijens, and M. Schmidt, eds. (Springer  
785 New York), pp. 299-313. 10.1007/978-1-4939-9546-2\_15.
- 786 49. Roux, K.J., Kim, D.I., Burke, B., and May, D.G. (2018). BioID: A Screen for Protein-Protein  
787 Interactions. *Curr Protoc Protein Sci* *91*, 19 23 11-19 23 15. 10.1002/cpps.51.
- 788 50. Mellacheruvu, D., Wright, Z., Couzens, A.L., Lambert, J.P., St-Denis, N.A., Li, T., Miteva, Y.V., Hauri,  
789 S., Sardiu, M.E., Low, T.Y., et al. (2013). The CRAPome: a contaminant repository for affinity  
790 purification-mass spectrometry data. *Nat Methods* *10*, 730-736. 10.1038/nmeth.2557.

- 791 51. Shafraz, O., Xie, B., Yamada, S., and Sivasankar, S. (2020). Mapping transmembrane binding  
792 partners for E-cadherin ectodomains. *Proc Natl Acad Sci U S A* *117*, 31157-31165.  
793 10.1073/pnas.2010209117.
- 794 52. Haldeman, J.M., Conway, A.E., Arlotto, M.E., Slentz, D.H., Muoio, D.M., Becker, T.C., and Newgard,  
795 C.B. (2019). Creation of versatile cloning platforms for transgene expression and dCas9-based  
796 epigenome editing. *Nucleic Acids Res* *47*, e23. 10.1093/nar/gky1286.
- 797 53. Weber, E., Engler, C., Gruetzner, R., Werner, S., and Marillonnet, S. (2011). A modular cloning  
798 system for standardized assembly of multigene constructs. *PLoS One* *6*, e16765.  
799 10.1371/journal.pone.0016765.
- 800 54. Chojnowski, A., Sobota, R.M., Ong, P.F., Xie, W., Wong, X., Dreesen, O., Burke, B., and Stewart,  
801 C.L. (2018). 2C-BioID: An Advanced Two Component BioID System for Precision Mapping of  
802 Protein Interactomes. *iScience* *10*, 40-52. 10.1016/j.isci.2018.11.023.
- 803 55. Yusa, K., Zhou, L., Li, M.A., Bradley, A., and Craig, N.L. (2011). A hyperactive piggyBac transposase  
804 for mammalian applications. *Proc Natl Acad Sci U S A* *108*, 1531-1536. 10.1073/pnas.1008322108.
- 805 56. Vandesompele, J., De Preter, K., Pattyn, F., Poppe, B., Van Roy, N., De Paepe, A., and Speleman,  
806 F. (2002). Accurate normalization of real-time quantitative RT-PCR data by geometric averaging  
807 of multiple internal control genes. *Genome Biol* *3*, RESEARCH0034. 10.1186/gb-2002-3-7-  
808 research0034.
- 809 57. Wu, T., Hu, E., Xu, S., Chen, M., Guo, P., Dai, Z., Feng, T., Zhou, L., Tang, W., Zhan, L., et al. (2021).  
810 clusterProfiler 4.0: A universal enrichment tool for interpreting omics data. *Innovation (Camb)* *2*,  
811 100141. 10.1016/j.xinn.2021.100141.
- 812 58. Tran, A.N., Dussaq, A.M., Kennell, T., Willey, C.D., and Hjelmeland, A.B. (2019). HPAanalyze: an R  
813 package that facilitates the retrieval and analysis of the Human Protein Atlas data. *Bmc*  
814 *Bioinformatics* *20*. ARTN 46310.1186/s12859-019-3059-z.
- 815 59. Ritchie, M.E., Phipson, B., Wu, D., Hu, Y., Law, C.W., Shi, W., and Smyth, G.K. (2015). limma powers  
816 differential expression analyses for RNA-sequencing and microarray studies. *Nucleic Acids Res* *43*,  
817 e47. 10.1093/nar/gkv007.
- 818 60. Tyanova, S., Temu, T., and Cox, J. (2016). The MaxQuant computational platform for mass  
819 spectrometry-based shotgun proteomics. *Nat Protoc* *11*, 2301-2319. 10.1038/nprot.2016.136.

820

## 821 **Figure legends**

822 Fig. 1. Workflow of a T2A split-link design. Engineered T2A and MUTT2A cell lines express  
823 TurboID (cyan) and the POI (brown) either physically separated or as a fusion protein,  
824 respectively. Proximal proteins in either setup are enriched by streptavidin pulldown, and  
825 quantified and identified by LC-MS/MS. Differential analysis between both setups highlights POI  
826 interaction partners as proteins enriched in the MUTT2A setup. POI, protein-of-interest; SA,  
827 streptavidin; LC-MS/MS, liquid chromatography with tandem mass spectrometry.

828 Fig. 2. A mammalian Golden Gate assembly system. Plasmids are arranged in hierarchy  
829 depending on their content. Level-0 are basic parts flanked by inward-cutting BsaI restriction sites.  
830 BsaI-based Golden Gate cloning of six Level-0 plasmid (with each position present) and a A-G  
831 backbone causes unidirectional assembly of each of these parts in the backbone plasmid. These

832 Level-1 plasmids express transcriptional units, and can similarly be assembled in a higher-order  
833 Level-2 plasmid containing two Level-1 transcriptional units by BsmBI-based Golden Gate  
834 assembly.

835 Fig. 3. Proximity labeling of the glucocorticoid receptor with a T2A split-link design. (a) differential  
836 analysis of TurboID-T2A-GR and TurboID-MUTT2A-GR. Bait is shown in red, TurboID in blue.  
837 Significant (adj. P-Value < 0.05) proteins that are also found in BioGRID are shown in crimson.  
838 Highlighted proteins are proteins also identified in other proximity labeling studies. (b) Pre-ranked  
839 gene set enrichment analysis (GSEA) of other proximity labeling studies within our data set.  
840 Maximal running enrichment score for each study is highlighted by a dotted line. (c) Pre-ranked  
841 GSEA showing enriched pathways in the c2 (curated gene sets) and c5 (ontology) collections of  
842 the Molecular Signature Database (MSigDB). Top 10 pathways enriched in the MUTT2A setup  
843 are shown. NES, normalized enrichment score.

844 Fig. 4. Proximity labeling of SARS-CoV-2 NCAP with a T2A split-link design. (a) differential  
845 analysis of TurboID-T2A-NCAP and TurboID-MUTT2A-NCAP. Bait is shown in red, TurboID in  
846 blue. Significant (adj. P-Value < 0.05) proteins that are also found in BioGRID are shown in  
847 crimson. (b) Pre-ranked gene set enrichment analysis (GSEA) of other proximity labeling studies  
848 within our data set. Maximal running enrichment score for each study is highlighted by a dotted  
849 line. (c) Pre-ranked GSEA showing enriched pathways in the c2 (curated gene sets) and c5  
850 (ontology) collections of the Molecular Signature Database (MSigDB). Top pathways enriched in  
851 the MUTT2A setup are shown. NES, normalized enrichment score.

852 Fig. 5. Proximity labeling of SARS-CoV-2 NSP7 with a T2A split-link design. (a) differential  
853 analysis of TurboID-T2A-NSP7 and TurboID-MUTT2A-NSP7. Bait is shown in red, TurboID in  
854 blue. Significant (adj. P-Value < 0.05) proteins that are also found in BioGRID are shown in  
855 crimson. (b) Pre-ranked gene set enrichment analysis (GSEA) of other proximity labeling studies  
856 within our data set. Maximal running enrichment score for each study is highlighted by a dotted  
857 line. (c) Pre-ranked GSEA showing enriched pathways in the c2 (curated gene sets) and c5  
858 (ontology) collections of the Molecular Signature Database (MSigDB). Top 10 pathways enriched  
859 in the MUTT2A setup are shown. NES, normalized enrichment score.

860 Fig. 6. T2A split-link experiments demonstrate a similar background as classical BioID  
861 experiments. (a) iBAQ intensities of AHNAK, FLNA, PKM, PRKDC, TOP1, and PARP1 in each  
862 experiment. (b) Distribution of the BioID CRAPome within each experiment. Baits are shown in

863 blue, proteins shared with the BioID CRAPome are shown in crimson. \*\*\*, adj. P-value < 0.05;  
864 \*\*\*\*\*, adj. P-value < 0.0005.

865 Fig. S1. Golden GateWAY for assembly of mammalian expression constructs. (a) schematic  
866 overview of a proof-of-concept lentiviral construct expressing msfGFP and nuclear mCherry  
867 proteins. (b) Transduced SKNBE2C and SHEP cells expressing the proof-of-concept construct  
868 after puromycin selection. Parental cell lines are shown as negative controls for the  
869 immunofluorescence. RSV, respiratory syncytial virus promoter; LTR, long terminal repeat; RRE,  
870 Rev response element; cPPT, central polypurine tract; EF1a, elongation factor 1 alpha promoter;  
871 msfGFP, monomeric superfolder green fluorescent protein; NLS, nuclear localization signal;  
872 WPRE, Woodchuck Hepatitis Virus posttranscriptional regulatory element; mPGK, murine  
873 phosphoglycerate kinase 1 promoter; PuroR, puromycin resistance gene; pA, polyadenylation  
874 signal; TU, transcriptional unit.

875 Fig. S2. Engineering and validation of TurboID-T2A/MUTT2A-GR A549 cell lines. (a) Schematic  
876 overview of TurboID-T2A/MUTT2A-GR piggyBac transposon constructs. (b) Expression (V5) and  
877 biotinylation (streptavidin) staining of induced TurboID-T2A/MUTT2A-GR A549 cell lines. Red  
878 arrows indicate the doxycycline conditions used for downstream experiments. (c) mRNA  
879 expression of GR-target genes *TSC22D3* and *DUSP1*. (d) Principal component analysis before  
880 and after removing outlying replicates. (e) iBAQ intensities of endogenously biotinylated proteins.  
881 (f) iBAQ intensities of housekeeping proteins. ITR, inverted terminal repeat; TRE, tetracycline  
882 responsive element; GR, glucocorticoid receptor; BgH pA, Bovine growth hormone  
883 polyadenylation signal; mPGK, murine phosphoglycerate kinase 1 promoter; BlastR, blasticidine  
884 resistance gene; TU, transcriptional unit; Dox, doxycycline; Dex, dexamethasone; PC, principal  
885 component; iBAQ, intensity-based absolute quantification.

886 Fig. S3. Engineering and validation of TurboID-T2A/MUTT2A-NCAP A549 cell lines. (a)  
887 Schematic overview of N- and C-terminally tagged NCAP with T2A/MUTT2A-TurboID piggyBac  
888 transposon constructs. (b,c) Expression (V5) and biotinylation (streptavidin) staining of A549 cells  
889 engineered with constructs shown in (a). (d) Principal component analysis before and after  
890 removing outlying replicates. (e) iBAQ intensities of endogenously biotinylated proteins. (f) iBAQ  
891 intensities of housekeeping proteins. ITR, inverted terminal repeat; TRE, tetracycline responsive  
892 element; GR, glucocorticoid receptor; BgH pA, Bovine growth hormone polyadenylation signal;  
893 mPGK, murine phosphoglycerate kinase 1 promoter; BlastR, blasticidine resistance gene; TU,  
894 transcriptional unit; Dox, doxycycline; Dex, dexamethasone; PC, principal component; iBAQ,  
895 intensity-based absolute quantification.

896 Fig. S4. Engineering and validation of TurboID-T2A/MUTT2A-NSP7 A549 cell lines. (a)  
897 Schematic overview of N- and C-terminally tagged NSP7 with T2A/MUTT2A-TurboID piggyBac  
898 transposon constructs. (b,c) Expression (V5) and biotinylation (streptavidin) staining of A549 cells  
899 engineered with constructs shown in (a). (d) Principal component analysis before and after  
900 removing outlying replicates. (e) iBAQ intensities of endogenously biotinylated proteins. (f) iBAQ  
901 intensities of housekeeping proteins. ITR, inverted terminal repeat; TRE, tetracycline responsive  
902 element; GR, glucocorticoid receptor; BgH pA, Bovine growth hormone polyadenylation signal;  
903 mPGK, murine phosphoglycerate kinase 1 promoter; BlastR, blasticidine resistance gene; TU,  
904 transcriptional unit; Dox, doxycycline; Dex, dexamethasone; PC, principal component; iBAQ, ,  
905 intensity-based absolute quantification.

906 Fig. S5. Subcellular localization of TurboID results in T2A skew for cytosolic POIs. (a) Number of  
907 differential proteins in the T2A setup ( $\log_2FC < -0.5$ ) for NSP7, NCAP, and GR T2A-split link  
908 experiments. (b) Overlap of significantly (adj. P-value  $< 0.05$ ) enriched proteins in the T2A setup  
909 between all three experiments. (c) Subcellular localization of all significantly enriched proteins in  
910 the T2A and MUTT2A setups. (d) Immunofluorescence of V5-TurboID-T2A/MUTT2A for GR and  
911 NCAP. All cell lines were induced with optimized doxycycline conditions and 50  $\mu$ M biotin. For the  
912 GR cell lines, cells were additionally treated with 1  $\mu$ M dexamethasone. SA, streptavidin; DAPI,  
913 4',6-diamidino-2-phenylindole.

914 Fig. S6. Uncropped immunoblots related to Fig. S2, S3, and S4.

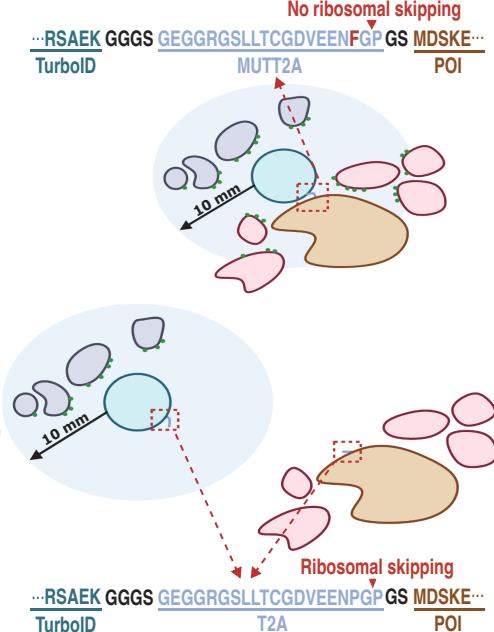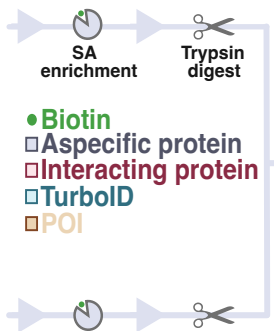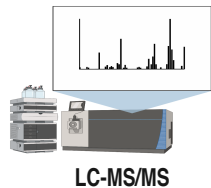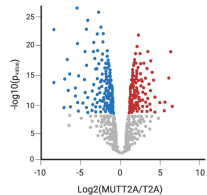

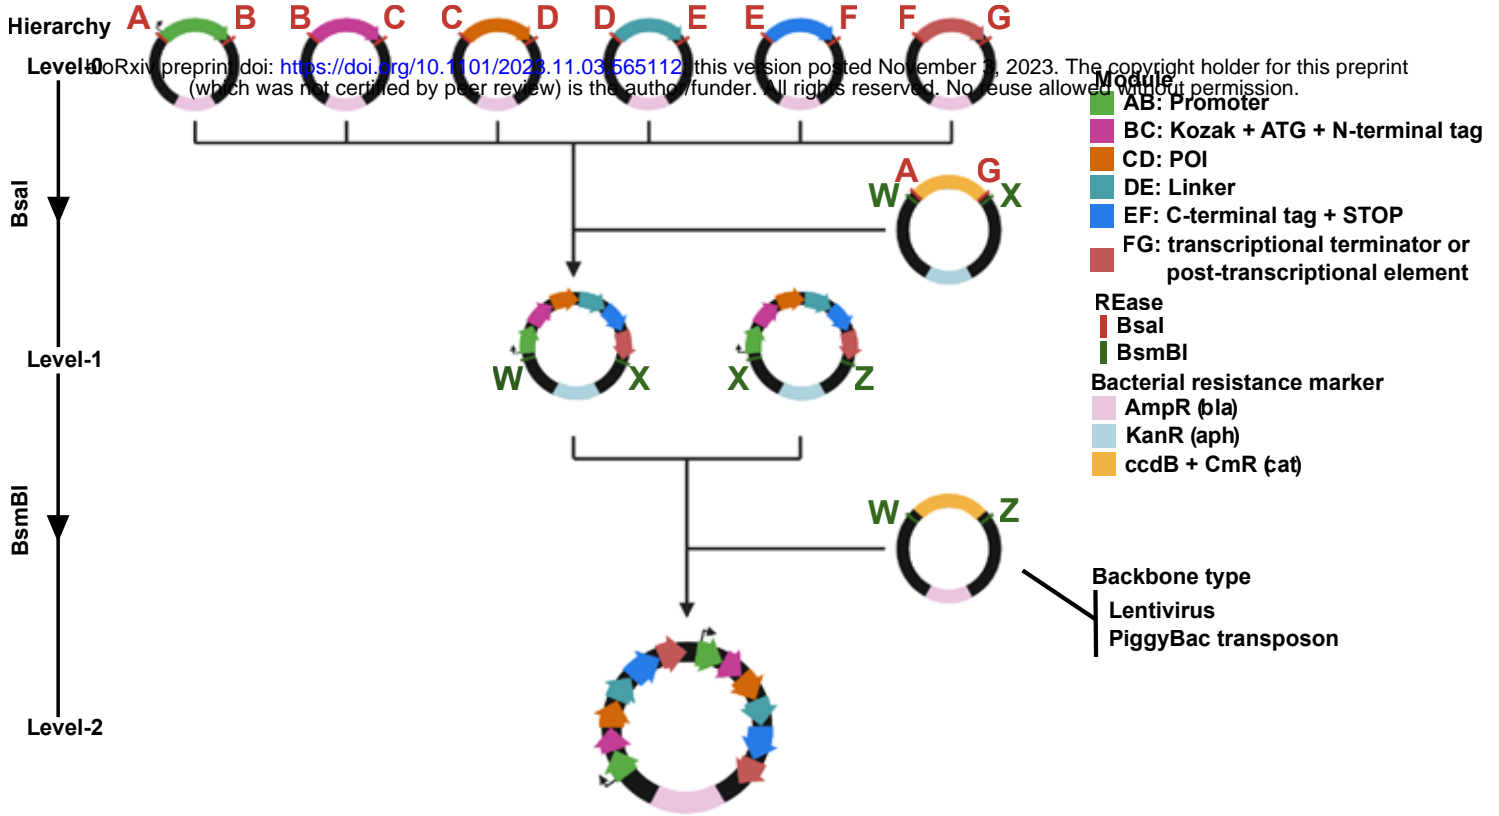

bioRxiv preprint doi: <https://doi.org/10.1101/2023.11.03.565112>; this version posted November 7, 2023. The copyright holder for this preprint (which was not certified by peer review) is the author/funder. All rights reserved. No reuse allowed without permission.



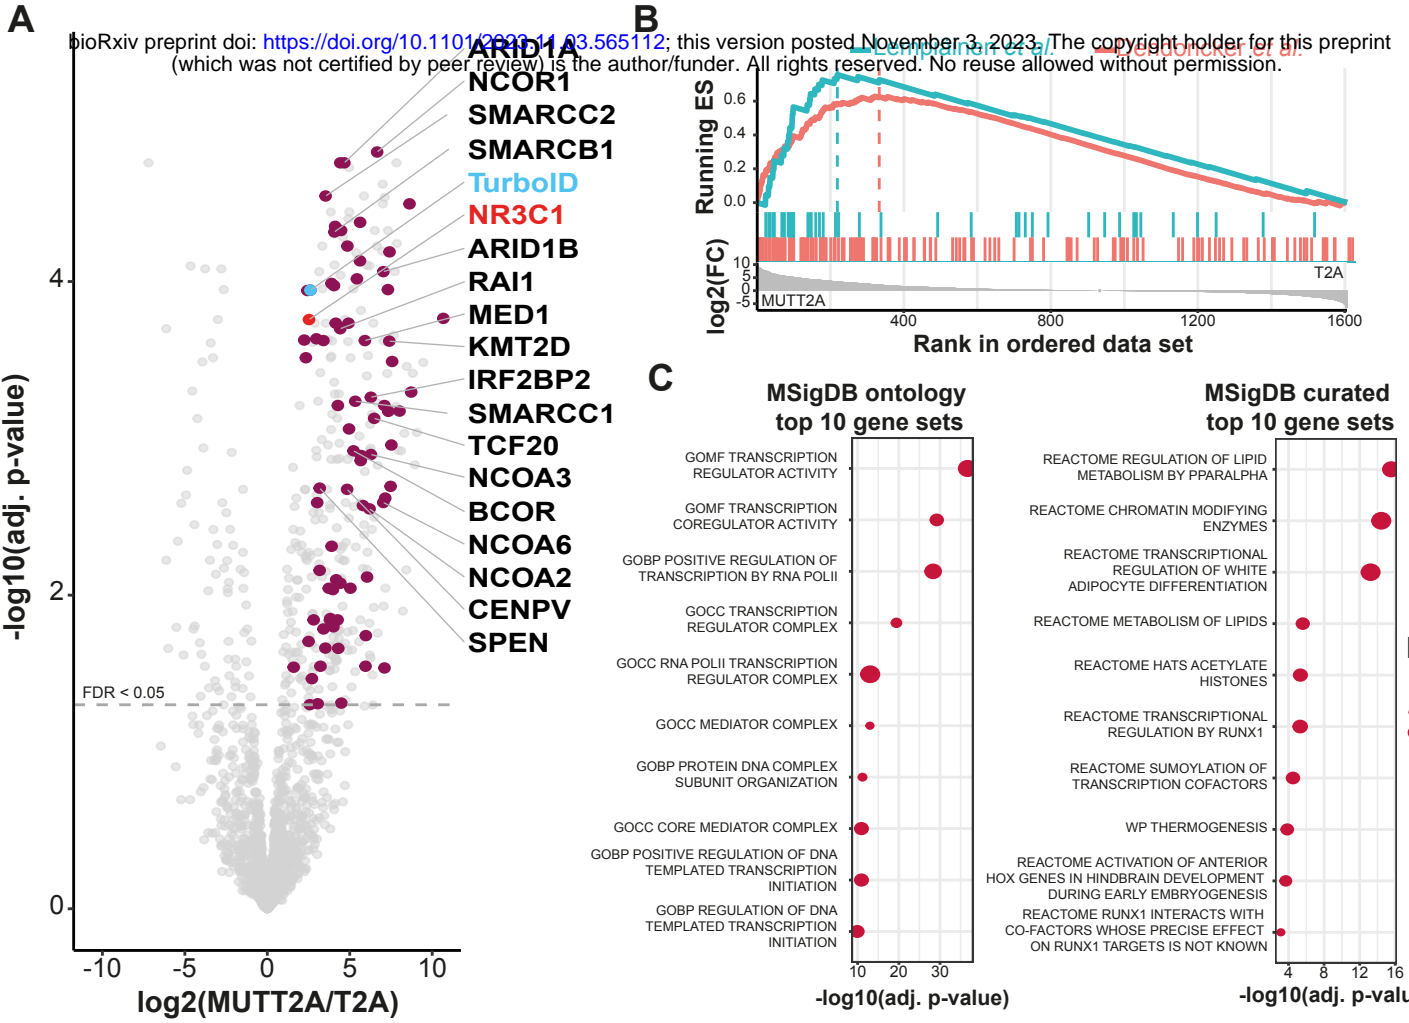

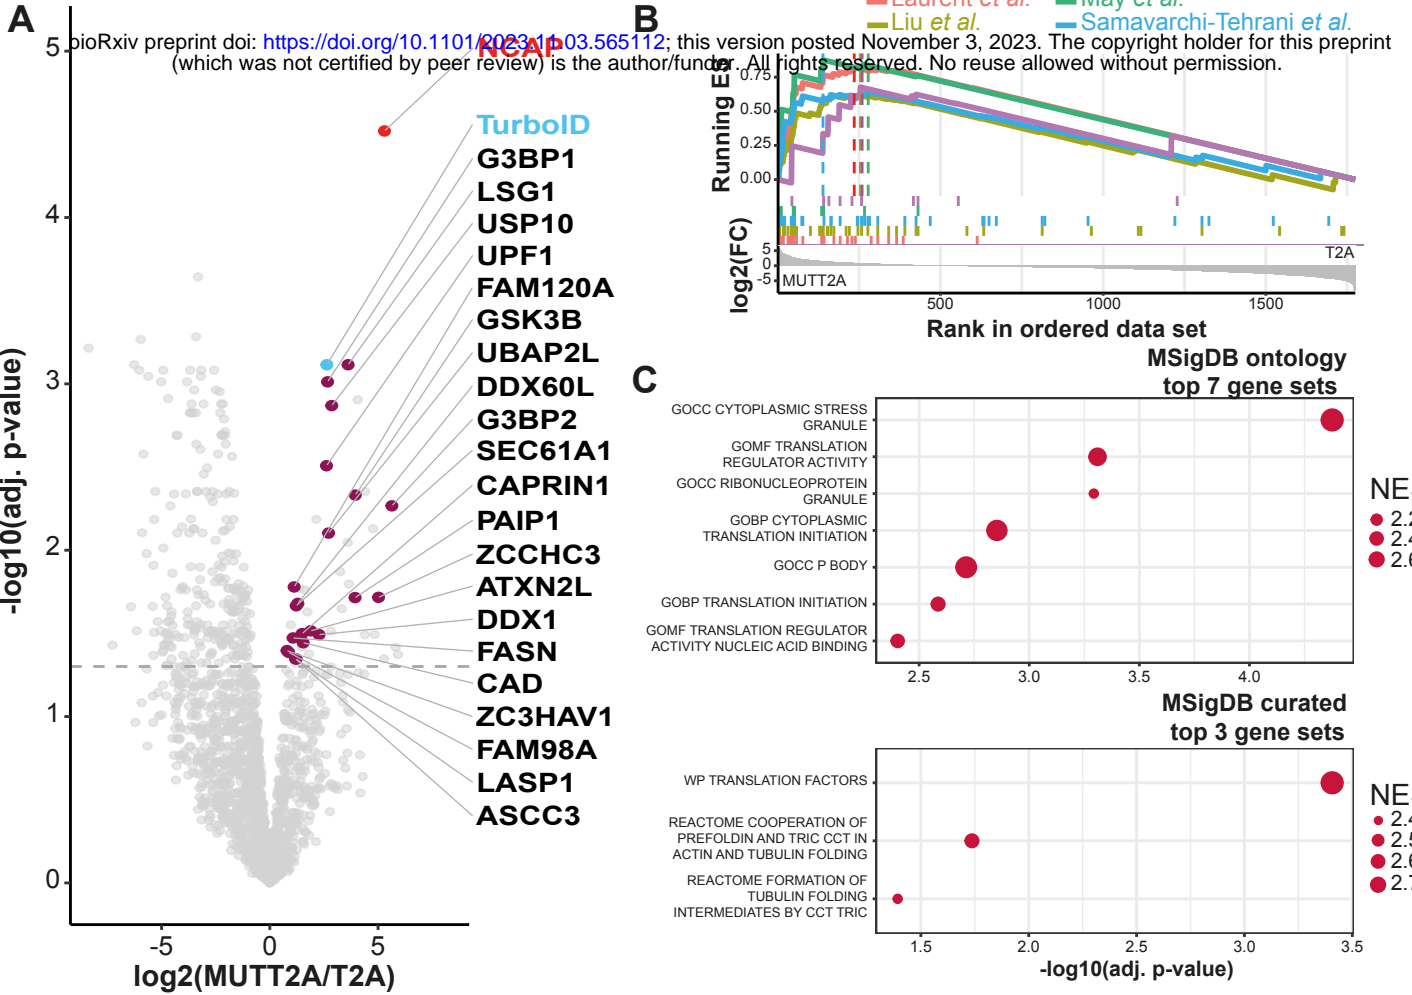

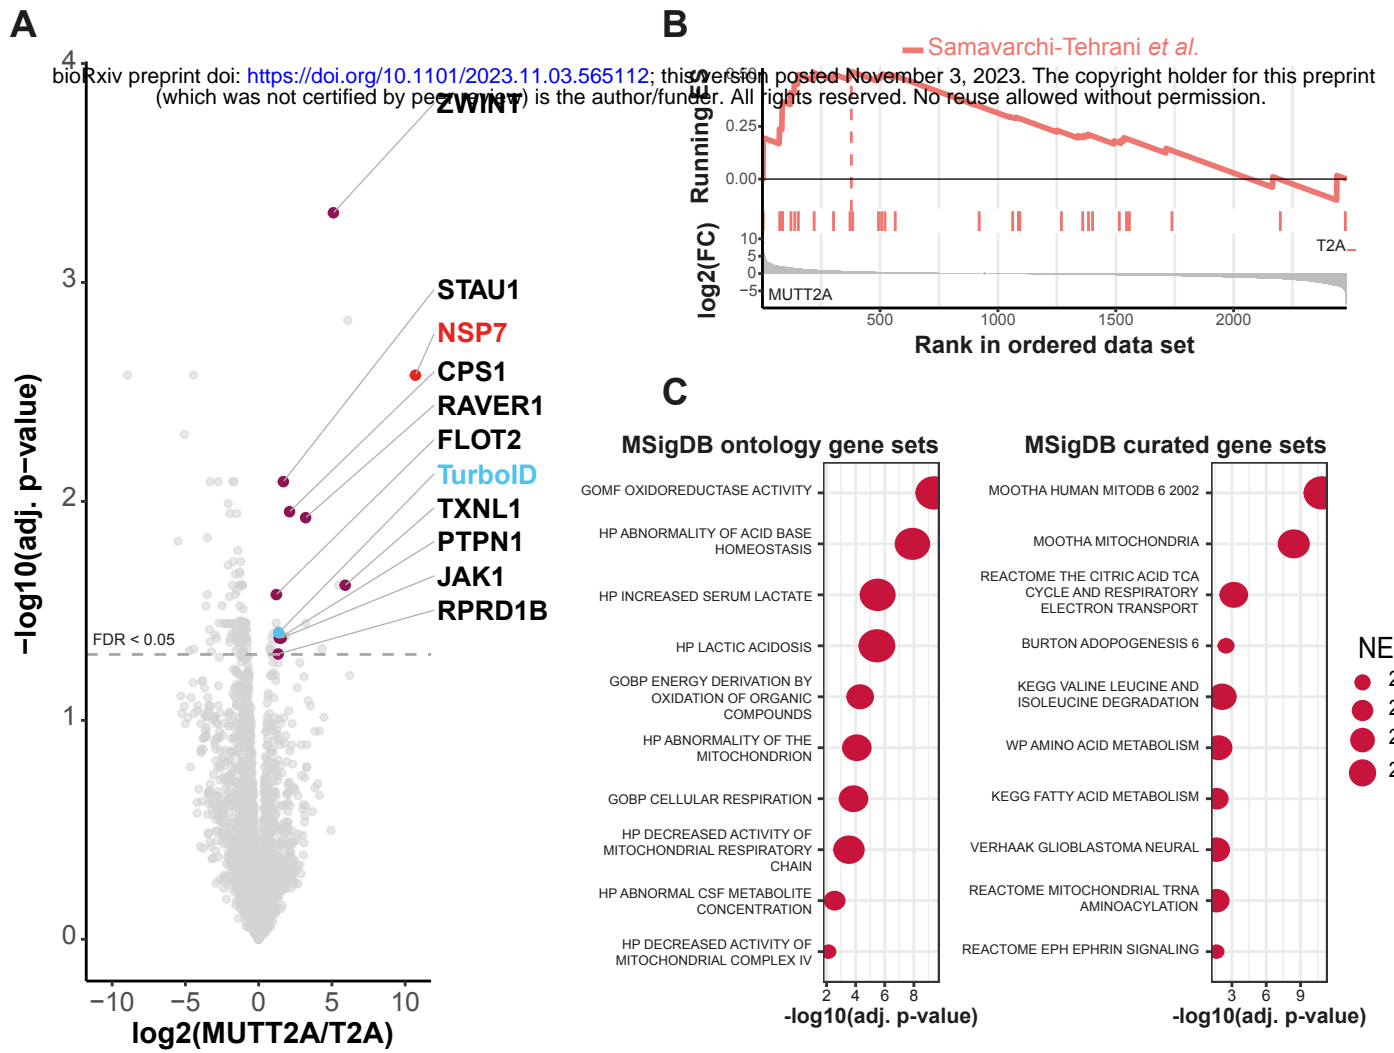

**A**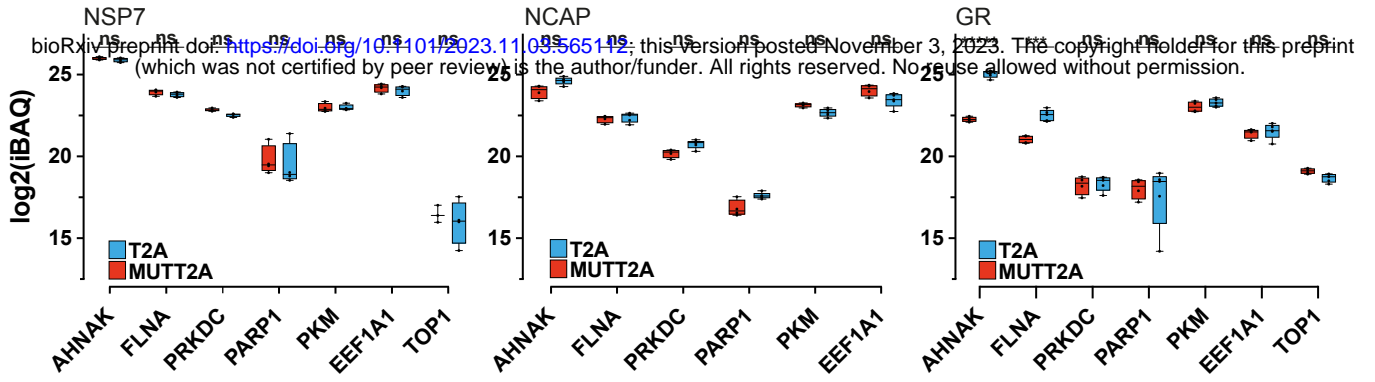**B**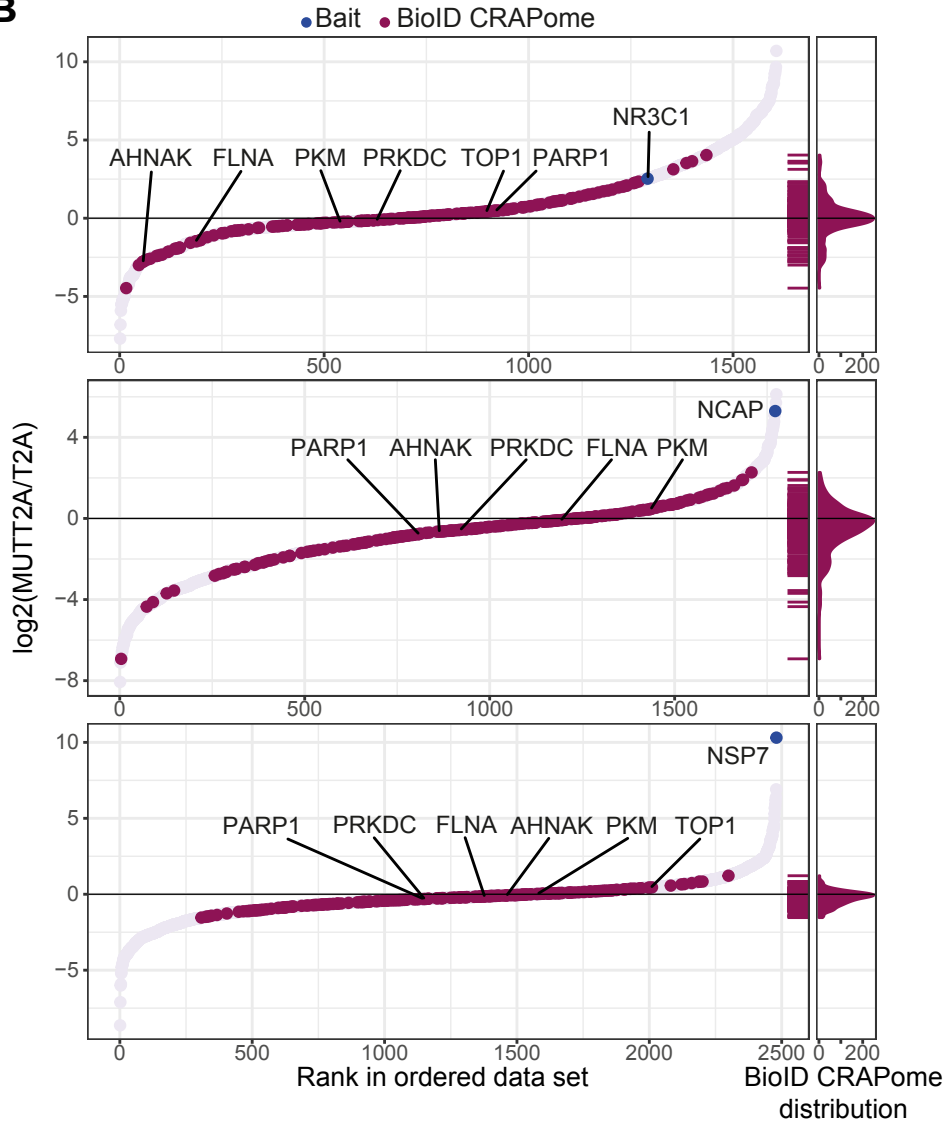

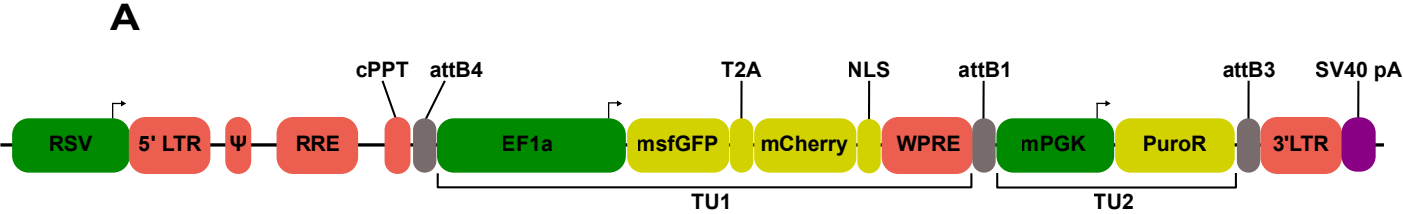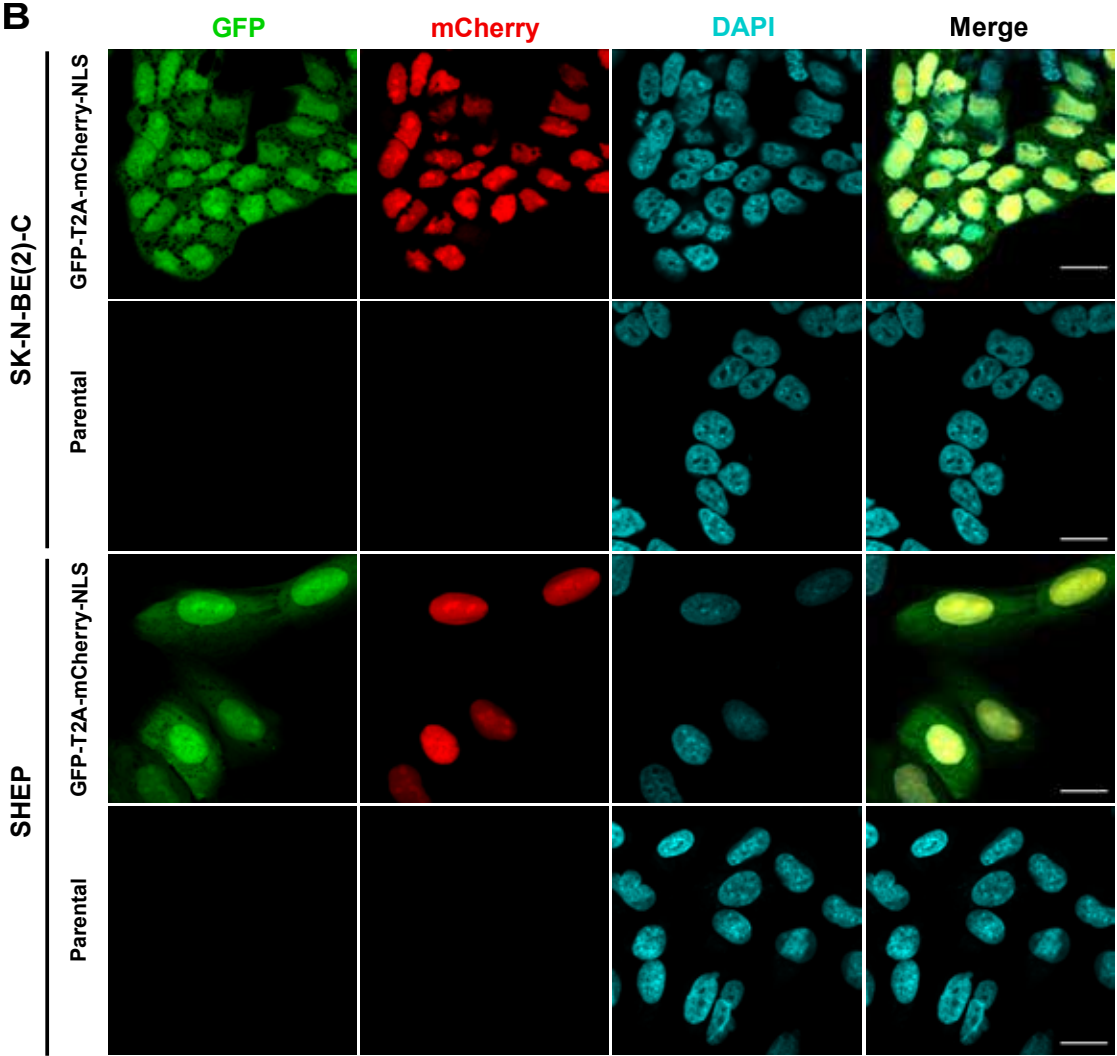

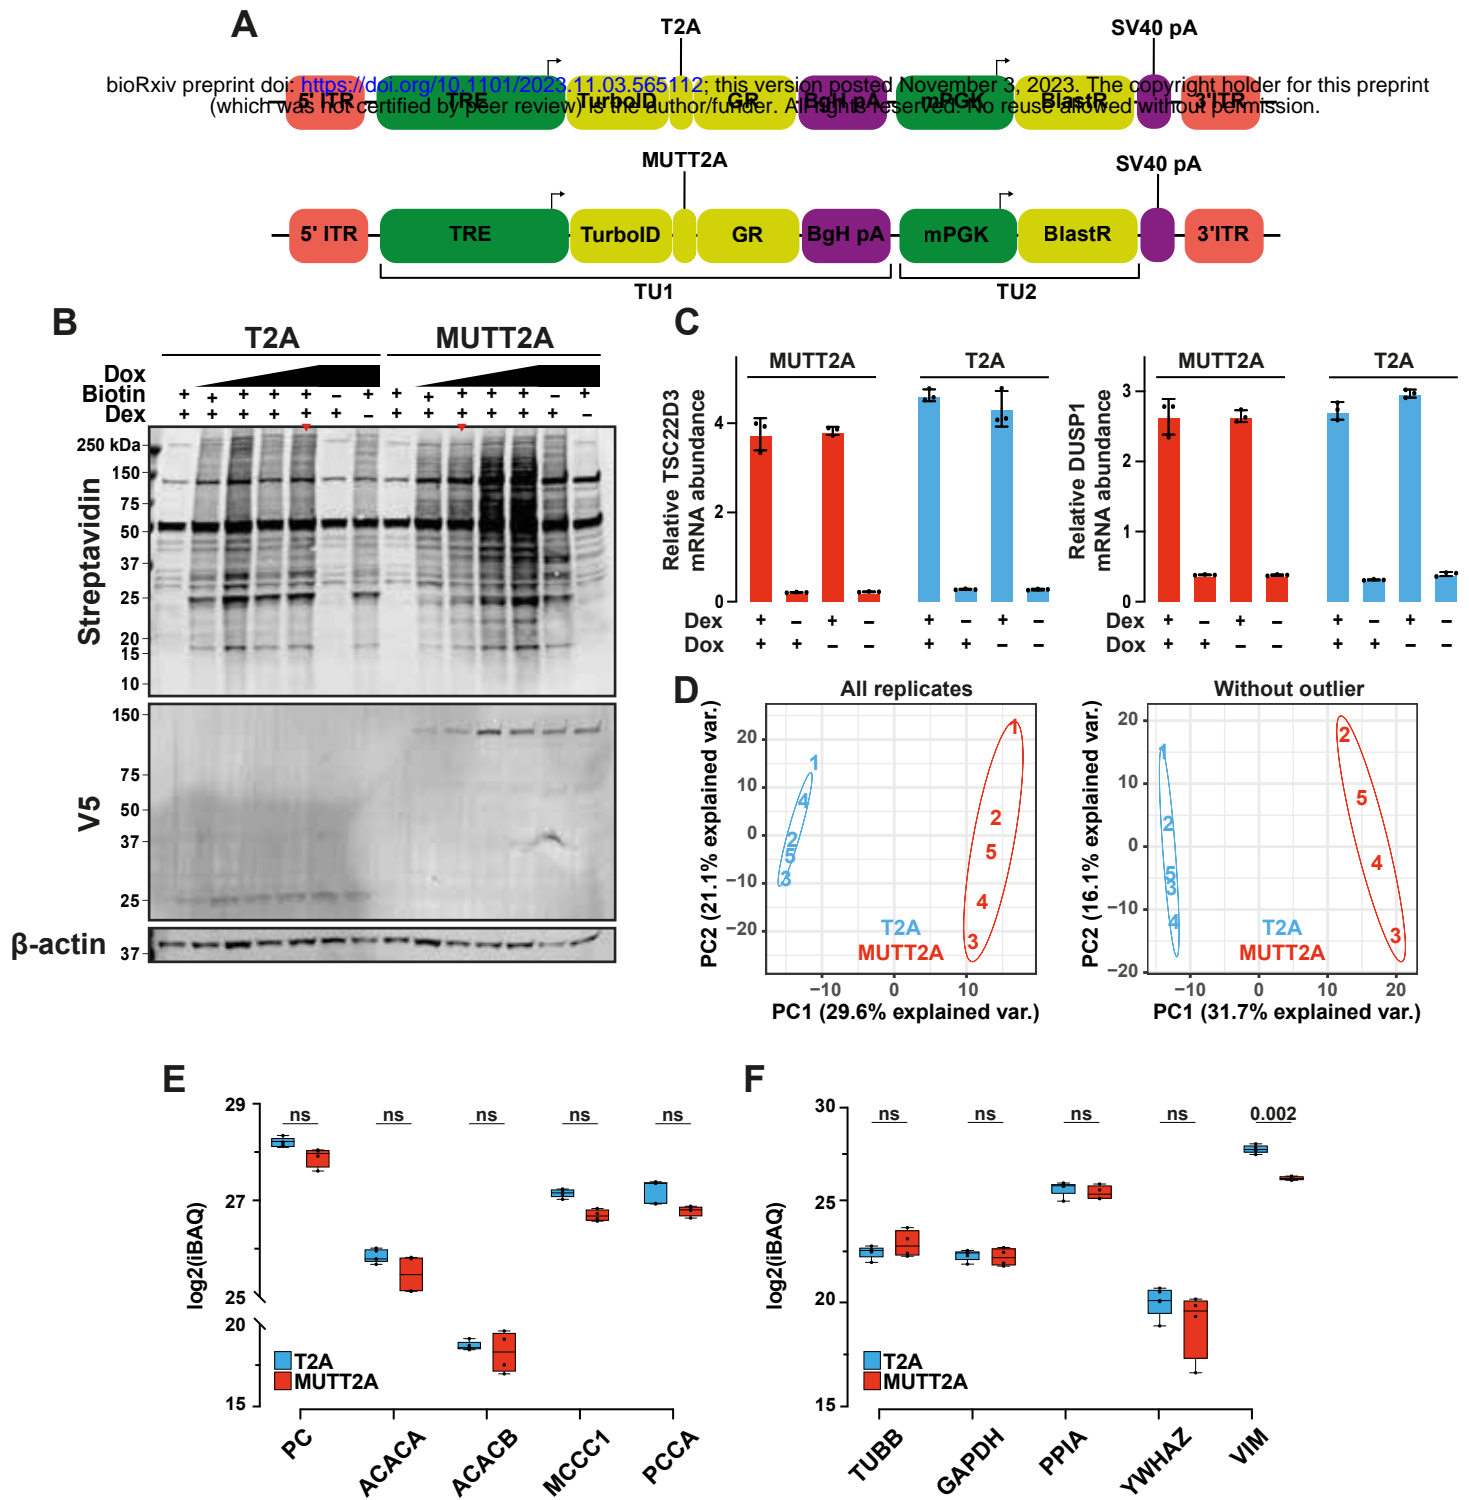

**A**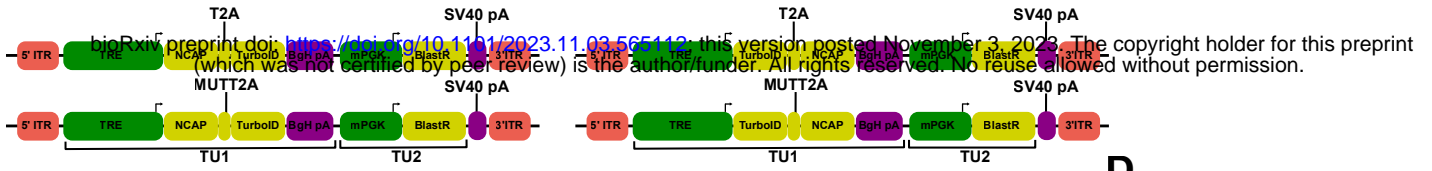**B**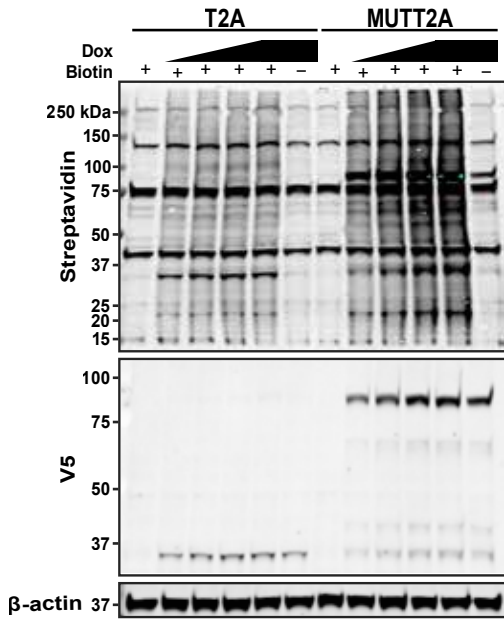**C**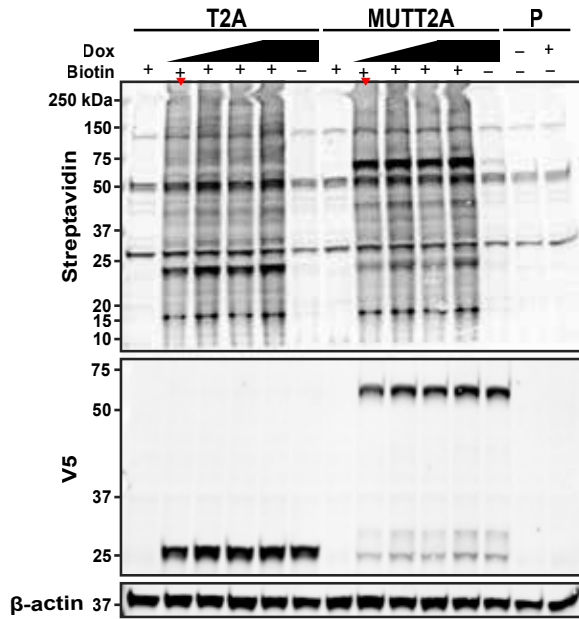**D**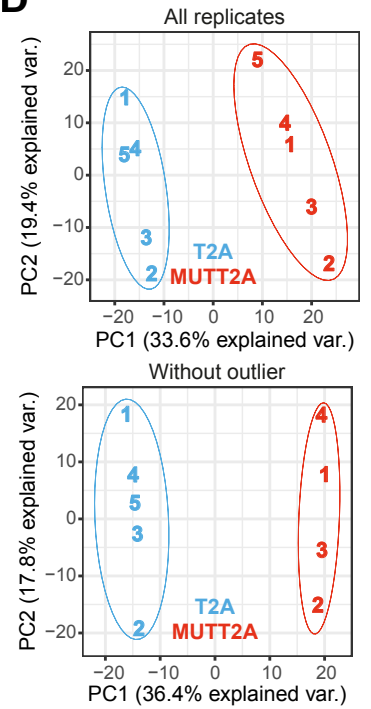**E**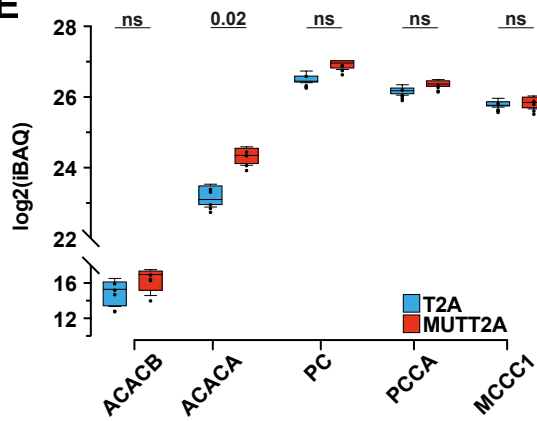**F**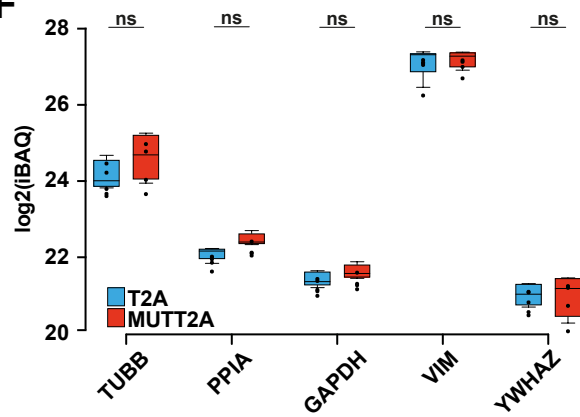

**A**

bioRxiv preprint doi: <https://doi.org/10.1101/2023.11.03.565112>; this version posted November 3, 2023. The copyright holder for this preprint (which was not certified by peer review) is the author/funder. All rights reserved. No reuse allowed without permission.

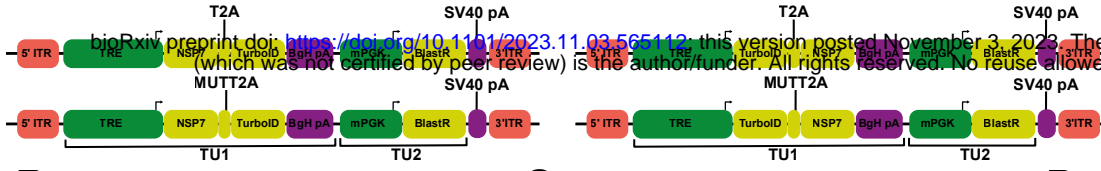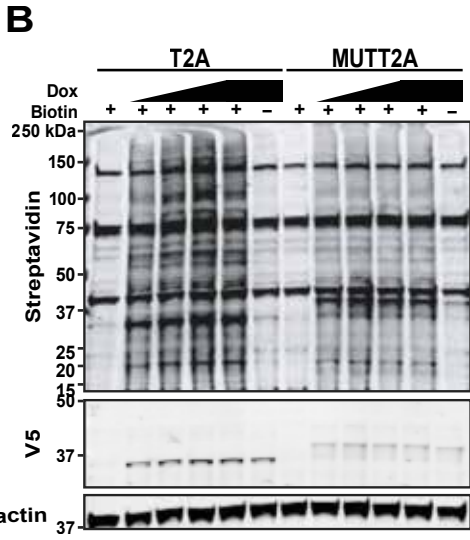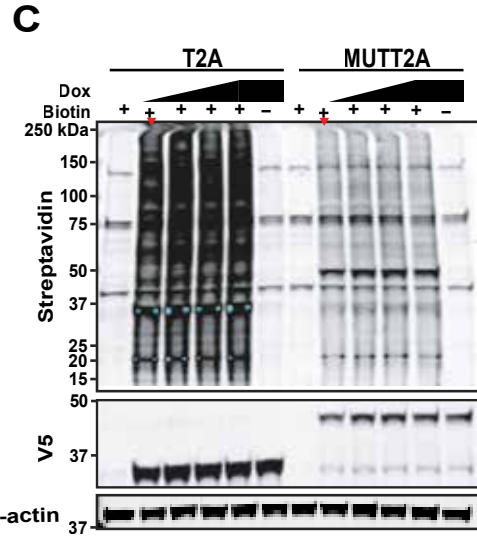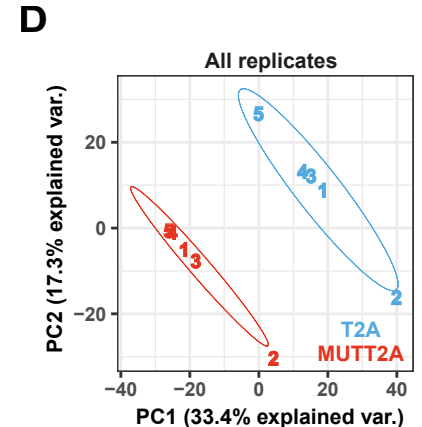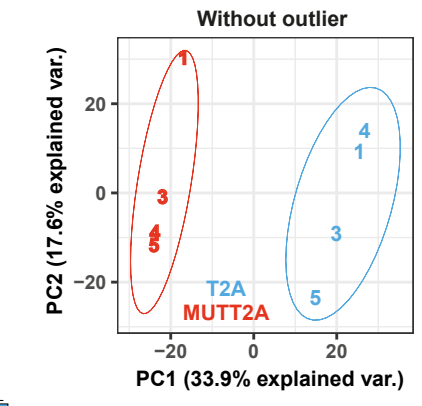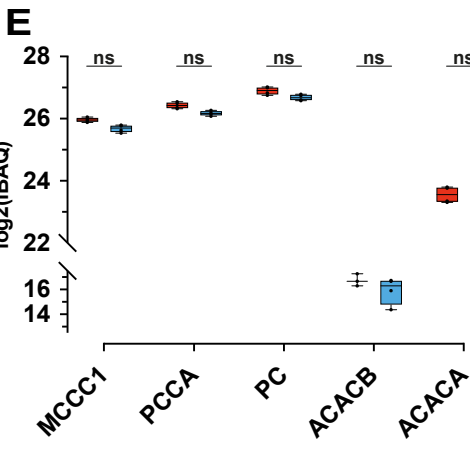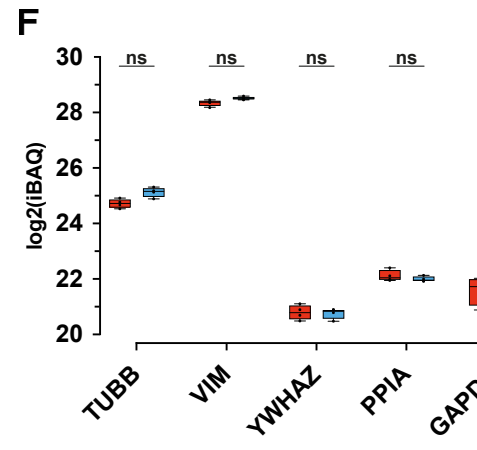



**A**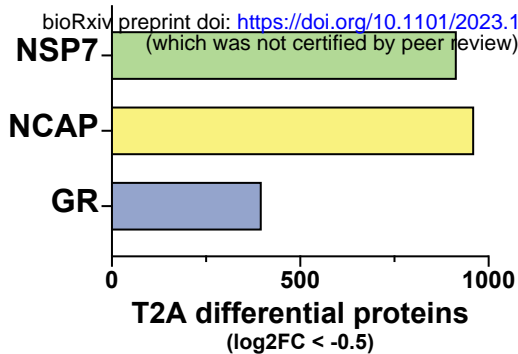**B**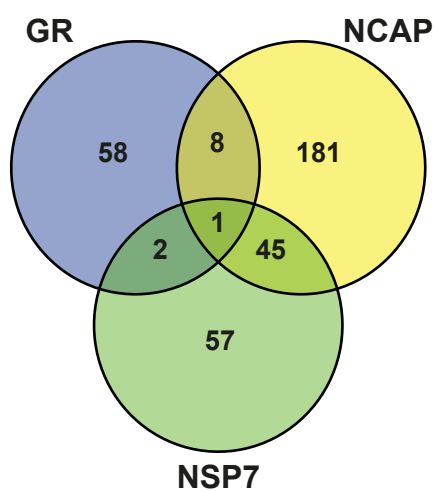**C**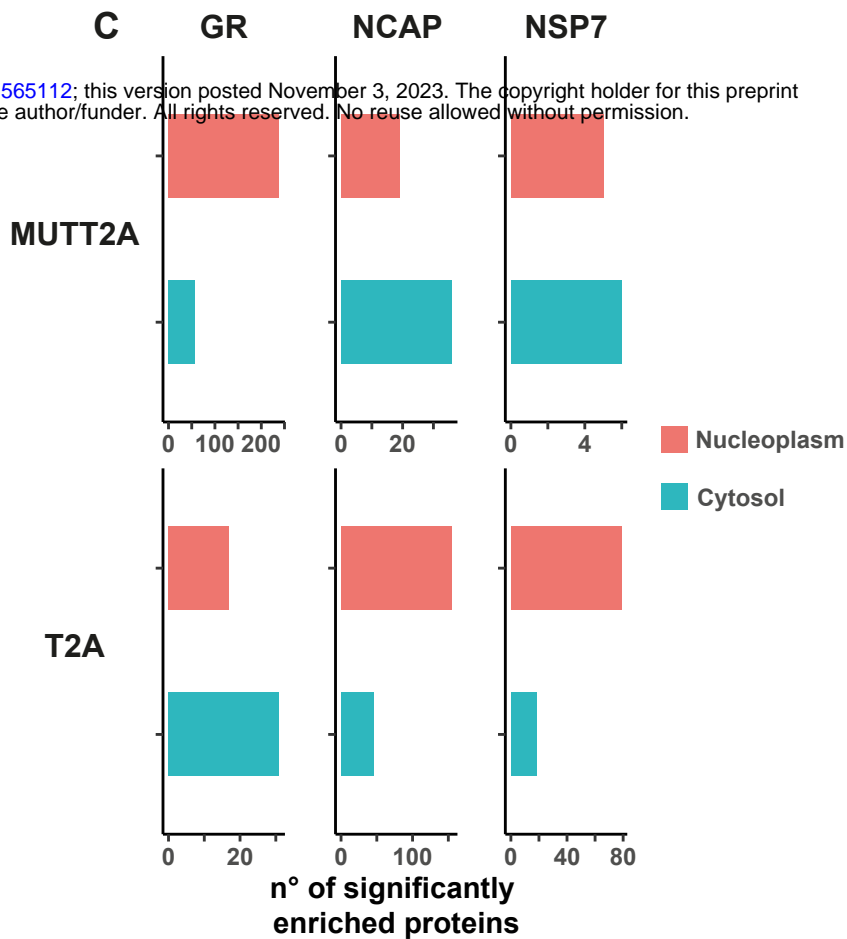**D**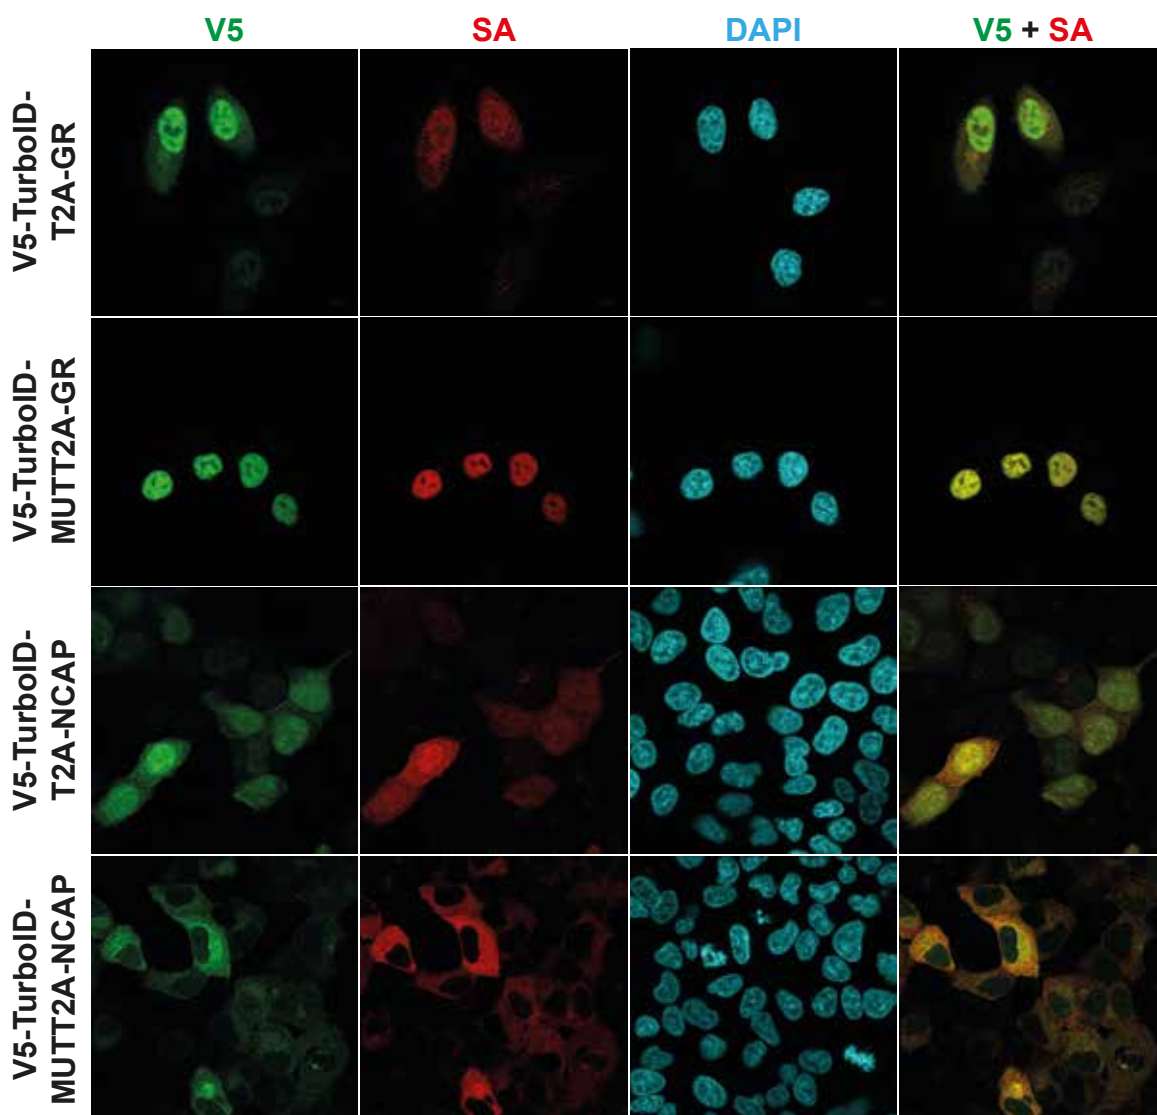

**anti-ACTB**

**anti-V5**

**SA**

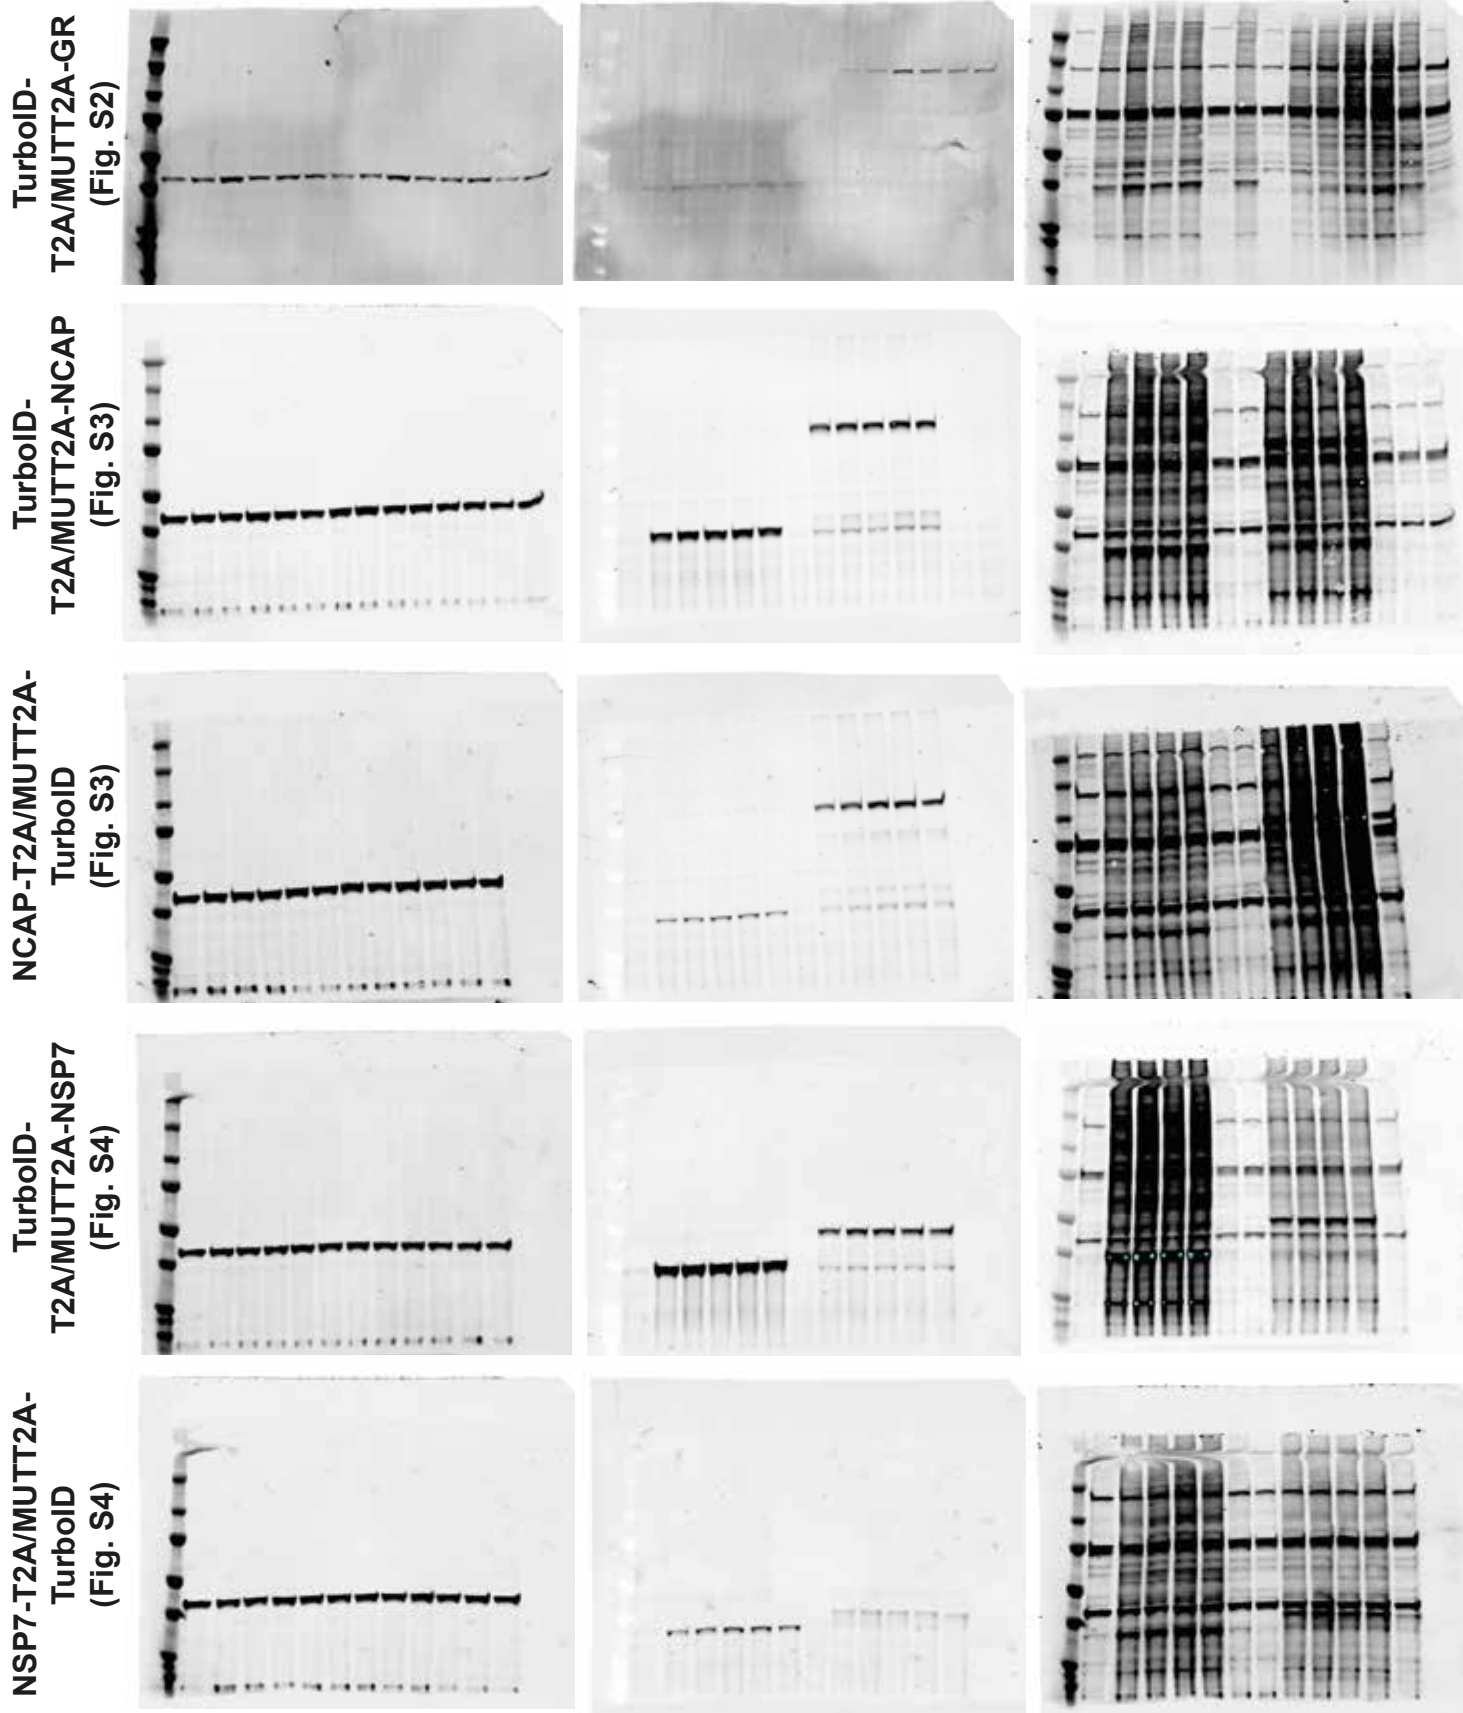

Source: https://www.biorxiv.org/content/biorxiv/early/2023/11/03/2023.11.03.565112.full.pdf
